# Supplementary material
Source: publisher site journal article supplement (https://www.dovepress.com/article/256828)
Supplement: Supplementary file 1 [file get_supplementary_file.php]

**Supplementary material 1** Search strategies for Medline and Embase - Strategies for the other databases can be obtained by the correspondent author

*Ovid MEDLINE(R) Epub Ahead of Print, In-Process & Other Non-Indexed Citations, Ovid MEDLINE(R) Daily and Ovid MEDLINE(R) 1946 to Present. Search date: 10 February 2017*

- 1 Amyotrophic Lateral Sclerosis/ (15384)
- 2 Motor Neuron Disease/ (3940)
- 3 (amyotrophic or lateral sclerosis\* or ALS or motor neuron disease or motor neurone disease or MND or gehrig\*).ti,ab,kw. (31209)
- 4 frontotemporal lobar degeneration/ or exp frontotemporal dementia/ (2961)
- 5 (frontotemporal dementia or FTD or (frontotemporal adj2 degeneration) or FTLD or (Pick\* adj2 disease) or frontal variant dementia or bv-FTD or f-FTD or presenile dementia).ti,ab,kw. (9778)
- 6 1 or 2 or 3 or 4 or 5 (42564)
- 7 exp cognition/ or executive function/ (136893)
- 8 cognition disorders/ or mild cognitive impairment/ (63818)
- 9 exp Language Disorders/ (44063)
- 10 exp Behavior/ (1433527)
- 11 (cognit\* or language disorder\* or verbal fluency or verbal memory or executive or behavior\* or behaviour\*).ti,ab,kw. (1218771)
- 12 7 or 8 or 9 or 10 or 11 (2365995)
- 13 (index or instrument or instruments or questionnaire or questionnaires or scale or scales or screen or test or tests or battery or batteries or inventory or examination or rating form or rating forms or assessment or assessments or checklist or checklists or interview or interviews).ti,ab,kw. (4081828)
- 14 6 and 12 and 13 (2966)
- 15 limit 14 to animals (236)
- 16 limit 15 to humans (127)
- 17 14 not (15 not 16) (2857)
- 18 limit 17 to "all child (0 to 18 years)" (273)
- 19 limit 17 to "all adult (19 plus years)" (1946)
- 20 17 not (18 not 19) (2743)

*Ovid MEDLINE(R) and Epub Ahead of Print, In-Process & Other Non-Indexed Citations and Daily <1946 to December 16, 2019>, Search date: 17 Dec. 2019*

- 1 Amyotrophic Lateral Sclerosis/ (18182)
- 2 Motor Neuron Disease/ (4248)
- 3 (amyotrophic or lateral sclerosis\* or ALS or motor neuron disease or motor neurone disease or MND or gehrig\*).ti,ab,kw. (39678)
- 4 frontotemporal lobar degeneration/ or exp frontotemporal dementia/ (3988)
- 5 (frontotemporal dementia or FTD or (frontotemporal adj2 degeneration) or FTLD or (Pick\* adj2 disease) or frontal variant dementia or bv-FTD or f-FTD or presenile dementia).ti,ab,kw. (12139)
- 6 1 or 2 or 3 or 4 or 5 (52917)
- 7 exp cognition/ or executive function/ (163848)
- 8 cognition disorders/ or Cognitive Dysfunction/ (77334)
- 9 exp Language Disorders/ (47706)
- 10 exp Behavior/ (1749582)
- 11 (cognit\* or language disorder\* or verbal fluency or verbal memory or executive or behavior\* or behaviour\*).ti,ab,kw. (1483431)
- 12 7 or 8 or 9 or 10 or 11 (2878231)
- 13 (index or instrument or instruments or questionnaire or questionnaires or scale or scales or screen or test or tests or battery or batteries or inventory or examination or rating form or rating forms or assessment or assessments or checklist or checklists or interview or interviews).ti,ab,kw. (4890750)
- 14 6 and 12 and 13 (3978)
- 15 limit 14 to animals (288)
- 16 limit 15 to humans (148)
- 17 14 not (15 not 16) (3838)
- 18 limit 17 to "all child (0 to 18 years)" (388)
- 19 limit 17 to "all adult (19 plus years)" (2553)
- 20 17 not (18 not 19) (**3674**)
- 21 Validation Studies/ or Psychometrics/ or Feasibility Studies/ or exp "Sensitivity and Specificity"/ or exp reproducibility of results/ (955049)
- 22 predict\*.mp. or scor\*.tw. or observ\*.mp. (5370935)
- 23 21 or 22 (5869434)
- 24 20 and 23 (**1885**)

Search lines 1 to 20 used in the first search of finding instruments in 2017. Validation filter from line 21, used in the second search for finding validated studies in the updated search in 2019

*Embase (Ovid) <1974 to 2017 February 09>*

- 1 Amyotrophic Lateral Sclerosis/ (31141)
- 2 Motor Neuron Disease/ (9851)
- 3 (amyotrophic or lateral sclerosis\* or ALS or motor neuron disease or motor neurone disease or MND or gehrig\*).ti,ab,kw. (42845)

- 4 exp frontotemporal dementia/ (14033)
- 5 (frontotemporal dementia or FTD or (frontotemporal adj2 degeneration) or FTL D or (Pick\* adj2 disease) or frontal variant dementia or bv-FTD or f-FTD or presenile dementia).ti,ab,kw. (15775)
- 6 1 or 2 or 3 or 4 or 5 (66679)
- 7 exp cognition/ (1979643)
- 8 cognitive defect/ or mild cognitive impairment/ (154984)
- 9 exp Language Disability/ (54813)
- 10 exp Behavior/ (3567062)
- 11 (cognit\* or language disorder\* or verbal fluency or verbal memory or executive or behavior\* or behaviour\*).ti,ab,kw. (1453516)
- 12 7 or 8 or 9 or 10 or 11 (5020969)
- 13 (index or instrument or instruments or questionnaire or questionnaires or scale or scales or screen or test or tests or battery or batteries or inventory or examination or rating form or rating forms or assessment or assessments or checklist or checklists or interview or interviews).ti,ab,kw. (5370546)
- 14 6 and 12 and 13 (8361)
- 15 limit 14 to (book or book series or chapter or conference abstract or conference paper or conference proceeding or "conference review" or editorial or erratum or letter or note or report or short survey or trade journal) (3529)
- 16 14 not 15 (4832)
- 17 limit 16 to child <unspecified age> (179)
- 18 limit 17 to (adult <18 to 64 years> or aged <65+ years>) (76)
- 19 16 not (17 not 18) (4729)
- 20 limit 19 to animals (165)
- 21 limit 20 to human (0)
- 22 19 not 20 (4564)

*Embase (OVID) <1974 to 2019 December 16>  
Search Date 17 Dec. 2019*

- 1 Amyotrophic Lateral Sclerosis/ (36203)
- 2 Motor Neuron Disease/ (9955)
- 3 (amyotrophic or lateral sclerosis\* or ALS or motor neuron disease or motor neurone disease or MND or gehrig\*).ti,ab,kw. (52987)
- 4 exp frontotemporal dementia/ (16697)
- 5 (frontotemporal dementia or FTD or (frontotemporal adj2 degeneration) or FTL D or (Pick\* adj2 disease) or frontal variant dementia or bv-FTD or f-FTD or presenile dementia).ti,ab,kw. (19476)
- 6 1 or 2 or 3 or 4 or 5 (81112)

- 7 exp cognition/ (2156533)
- 8 cognitive defect/ or mild cognitive impairment/ (178702)
- 9 exp Language Disability/ (60350)
- 10 exp Behavior/ (3873970)
- 11 (cognit\* or language disorder\* or verbal fluency or verbal memory or executive or behavior\* or behaviour\*).ti,ab,kw. (1789558)
- 12 7 or 8 or 9 or 10 or 11 (5668691)
- 13 (index or instrument or instruments or questionnaire or questionnaires or scale or scales or screen or test or tests or battery or batteries or inventory or examination or rating form or rating forms or assessment or assessments or checklist or checklists or interview or interviews).ti,ab,kw. (6666167)
- 14 6 and 12 and 13 (10402)
- 15 limit 14 to (book or book series or chapter or conference abstract or conference paper or conference proceeding or "conference review" or editorial or erratum or letter or note or report or short survey or trade journal) (4740)
- 16 14 not 15 (5662)
- 17 limit 16 to child <unspecified age> (166)
- 18 limit 17 to (adult <18 to 64 years> or aged <65+ years>) (64)
- 19 16 not (17 not 18) (5560)
- 20 limit 19 to animals (237)
- 21 limit 20 to human (0)
- 22 19 not 20 (**5323**)
- 23 validation study/ or psychometry/ or feasibility study/ or "sensitivity and specificity"/ or reproducibility/ (725129)
- 24 predict\*.tw. or exp methodology/ or validat\*.tw. (7502595)
- 25 23 or 24 (7781725)
- 26 22 and 25 (**2589**)

Search lines 1 to 22 used in the first search of finding instruments in 2017. Validation filter from line 23, used in the second search for finding validated studies in the second search in 2019

**Supplementary material 2** Cognitive tests identified in Phase I, classified into cognitive domains, test batteries and scales

| Cognitive domain and test                            | Reference number |
|------------------------------------------------------|------------------|
| <i>Attention, orientation and working memory</i>     |                  |
| Alternating S-task                                   | 1                |
| Alertness task                                       | 2-4              |
| Brown-Peterson Technique/ Auditory Constant Trigrams | 5-8              |

|                                               |                                                                                                                                                           |
|-----------------------------------------------|-----------------------------------------------------------------------------------------------------------------------------------------------------------|
| Circle discrimination                         | 9,10                                                                                                                                                      |
| Conflict instruction                          | 11,12                                                                                                                                                     |
| Continuous Performance Test                   | 13-17                                                                                                                                                     |
| Corsi Block-tapping Test                      | 4,18-27                                                                                                                                                   |
| Counting test/task of Wilkins                 | 28                                                                                                                                                        |
| D2                                            | 29-32                                                                                                                                                     |
| Delayed alternation test                      | 5,7                                                                                                                                                       |
| Digit Span backward                           | 2,4,11,14,15,18-20,22,23,25-27,31,33-107                                                                                                                  |
| Digit Span forward                            | 3,12,23,24,27,44,45,65,81,89-91,100,106,108                                                                                                               |
| Five-choice reaction time                     | 9,10                                                                                                                                                      |
| Go-Nogo tasks                                 | 2,15,20,58,70,83,108                                                                                                                                      |
| Incompatibility test                          | 109                                                                                                                                                       |
| Information and orientation                   | 62,110                                                                                                                                                    |
| King-Devick Test                              | 13                                                                                                                                                        |
| Letter-Number Sequencing                      | 16,89-91,111                                                                                                                                              |
| Letter Span test                              | 112-114                                                                                                                                                   |
| Little Man Test                               | 28                                                                                                                                                        |
| Matching to sample                            | 9,10                                                                                                                                                      |
| Mental Control                                | 104                                                                                                                                                       |
| Money Road-Map Test                           | 28                                                                                                                                                        |
| N-Back Task                                   | 2,115,116                                                                                                                                                 |
| Paced Auditory Serial Addition task           | 11,79,112,114,117                                                                                                                                         |
| Phonological Similarities effect              | 118                                                                                                                                                       |
| Reading Span Test                             | 2                                                                                                                                                         |
| Spatial Working Memory                        | 10                                                                                                                                                        |
| Stroop Test/Color- Word Interference Test     | 3,6,13,15,16,19,21,22,28,29,31,36-41,43,44,48-51,53,57-59,64,66-68,70,74,76,79,82-84,87-91,98-100,102-105,107-109,117,119-142                             |
| Symbol substitution test                      | 1,6,28,43,44,53,54,101,102,122,128,129,136,143-145                                                                                                        |
| Telephone search dual task                    | 146                                                                                                                                                       |
| Trail Making tests                            | 1,4,11,12,15,16,22,23,27,33,36,45,47,48,51,53,54,58-60,65-70,72,74-76,84-86,96-99,101,103,104,107,109-111,121,123,125,129,131,132,137-139,141,144,147-155 |
| Visual inspection time test                   | 25                                                                                                                                                        |
| Visual search matching to sample              | 9,10                                                                                                                                                      |
| <b><i>Concept formation and reasoning</i></b> |                                                                                                                                                           |
| Arithmetic                                    | 44,45,96,101,117,144                                                                                                                                      |
| Brixton Spatial Anticipation Test             | 25,38-41,49,50,64,87,156-163                                                                                                                              |

|                                           |                                                                                                                                                                                                                            |
|-------------------------------------------|----------------------------------------------------------------------------------------------------------------------------------------------------------------------------------------------------------------------------|
| Card sorting tests                        | 2-5,7,8,16-19,23,27-29,31,32,34,45,46,57,58,69,70,72,74,79,84,85,89-91,93,95-97,99-101,104,110,112-114,119,121,123,125-127,131,132,134,137,141,142,144,146,151,155,160,162,164-179                                         |
| Category Test                             | 145                                                                                                                                                                                                                        |
| Cognitive Estimation task                 | 95                                                                                                                                                                                                                         |
| Identities and Oddities task              | 180                                                                                                                                                                                                                        |
| Matrix Reasoning                          | 45,101,103,181                                                                                                                                                                                                             |
| Picture Arrangement                       | 12,96,144                                                                                                                                                                                                                  |
| Picture Completion                        | 2,29,62,96,144                                                                                                                                                                                                             |
| Proverbs Test                             | 14,79                                                                                                                                                                                                                      |
| Raven's Coloured Progressive Matrices     | 4,10-12,16-18,20,21,23,24,27,30,32,34,42,46,69,77-80,85,86,93-95,98,100,113,114,118,123,128,131,140,164,167,169,170,177,179,182-191                                                                                        |
| Reserval learning test                    | 192                                                                                                                                                                                                                        |
| Similarities                              | 2,14,29,45,54,58,60,62,70,77,79,96,97,99,101,103,104,108,117,134,141,144,180,193-195                                                                                                                                       |
| Temporal Rules Induction                  | 20                                                                                                                                                                                                                         |
| Visual-Verbal Test                        | 52,72                                                                                                                                                                                                                      |
| <i>Construction and motor performance</i> |                                                                                                                                                                                                                            |
| Benson Figure (copy)                      | 19,71                                                                                                                                                                                                                      |
| Block Design                              | 1,2,5,7,8,15,45,70,74,96,97,101,103,124,131,144,181                                                                                                                                                                        |
| Clock drawing test                        | 43,44,194,196                                                                                                                                                                                                              |
| Complex Figure Test (copy)                | 20,33,54,66,100,137,185,197,198                                                                                                                                                                                            |
| Cube drawing                              | 196                                                                                                                                                                                                                        |
| De Renzi test                             | 18                                                                                                                                                                                                                         |
| Finger Tapping Test                       | 62                                                                                                                                                                                                                         |
| Grooved Pegboard                          | 59                                                                                                                                                                                                                         |
| Kohs Block Design test                    | 79                                                                                                                                                                                                                         |
| Memory for sticks and design              | 108                                                                                                                                                                                                                        |
| Object Assembly                           | 45,144                                                                                                                                                                                                                     |
| Rosen Drawing Test                        | 180                                                                                                                                                                                                                        |
| <i>Executive functioning</i>              |                                                                                                                                                                                                                            |
| Alternate Uses Test                       | 181                                                                                                                                                                                                                        |
| Category fluency tests                    | 1,4,10,15,18-23,27,34-40,42-44,47,49,50,52,55,57,60,64-68,70-72,76,78,82-87,89-92,95-97,99,100,102,104-106,112-114,116,118,121,123,127,129-131,134-137,146,147,151,152,155,158,162,166,173,180,184,185,188,189,194,199-210 |
| Design Fluency tests                      | 2,3,31,71,74,84,104,109,112-114,118,128,143,151,173                                                                                                                                                                        |
| Elithorn's Perceptual Maze Test           | 21                                                                                                                                                                                                                         |
| Guilford's Consequences                   | 181                                                                                                                                                                                                                        |
| Hayling and Brixton Tests                 | 22,73,111-114,118,146-148,157-160,162,179,199,200                                                                                                                                                                          |

|                                             |                                                                                                                                                                                                                                                                                       |
|---------------------------------------------|---------------------------------------------------------------------------------------------------------------------------------------------------------------------------------------------------------------------------------------------------------------------------------------|
| Holiday Apartment Test                      | 192                                                                                                                                                                                                                                                                                   |
| Iowa Gambling Test                          | 73,159,172                                                                                                                                                                                                                                                                            |
| Luria's motor sequences                     | 18                                                                                                                                                                                                                                                                                    |
| Phonemic fluency tests/Letter fluency tests | 2-8,10,14,15,18-20,22-25,27-29,32-36,38-44,47-53,56-60,63-67,71,72,74-78,81-87,89-92,95-97,99,100,102-104,108,109,111-114,116,118,119,121-123,125,127-129,131,134-137,139,143,145-148,150-152,154,155,157-160,162,163,165-167,173,178-180,184,189,190,192,198-200,202,204-208,210-222 |
| Stockings of Cambridge                      | 9,10,192                                                                                                                                                                                                                                                                              |
| Tower Tests                                 | 16,22,66,67,70,99,100,116,119,135,139,155                                                                                                                                                                                                                                             |

---

*Learning and memory*

---

|                                                                             |                                                                                                                                           |
|-----------------------------------------------------------------------------|-------------------------------------------------------------------------------------------------------------------------------------------|
| Adult Memory and Information Processing Battery                             | 81,160                                                                                                                                    |
| Auditory-Verbal Learning Test                                               | 3,31,48,101,116                                                                                                                           |
| Autobiographical Memory questionnaire                                       | 21                                                                                                                                        |
| Babcock Story Recall test                                                   | 23,47,223,224                                                                                                                             |
| Benton Visual Retention Test                                                | 29,45,57,69,180                                                                                                                           |
| Brain Injury Rehabilitation Trust Memory and Information Processing Battery | 160                                                                                                                                       |
| Brief Visuospatial Memory Test-Revised                                      | 53,60,97,104                                                                                                                              |
| California Verbal Learning Test                                             | 15,16,36,38,40,49,50,64,66,67,71,74,82-84,87,104,145,146,151,178                                                                          |
| Clinical Memory Test                                                        | 43,44                                                                                                                                     |
| Complex Figure Test (recall)                                                | 14,16-18,20,22,31,34,38,40,45,46,48-50,58,59,64,70,71,75,82,83,85,87,88,96,97,100,101,123,126,129,131,137,138,148,152,167,185,198,201,224 |
| Confabulation questionnaire                                                 | 21                                                                                                                                        |
| Continuous recognition memory test                                          | 145                                                                                                                                       |
| Doors and People test                                                       | 89-91,128,160                                                                                                                             |
| Drilled Word Span                                                           | 108                                                                                                                                       |
| Evocation test                                                              | 205                                                                                                                                       |
| Faces                                                                       | 65,99,101                                                                                                                                 |
| Hopkins Verbal Learning Test                                                | 65,127                                                                                                                                    |
| Inglis paired associate test                                                | 46                                                                                                                                        |
| Kendrick Object Learning Test                                               | 28,80,81,112-114,119,133,159,165,179                                                                                                      |
| Logical Memory                                                              | 1,25,36,38,40,46,49,50,62,77,87,88,102,103,108,117,129,136,138                                                                            |
| Luria-Nebraska Neuropsychological Battery memory test                       | 45                                                                                                                                        |
| Mini- survey of autobiographical memory                                     | 53                                                                                                                                        |
| Non-verbal Learning Test                                                    | 170                                                                                                                                       |
| Prose Memory Test                                                           | 6                                                                                                                                         |

---

|                                            |                                                                                                                            |
|--------------------------------------------|----------------------------------------------------------------------------------------------------------------------------|
| Prospective memory test                    | 130                                                                                                                        |
| Recognition Memory Test                    | 5,7,8,28,79,112-114,119,165,176,179,185,225                                                                                |
| Recurring Figure test                      | 2,3,29                                                                                                                     |
| Rey Auditory- Verbal Learning Test         | 2,5,7,8,18,20,33,34,36,37,41,42,53,54,57,59,66,67,75,89-91,93,95-97,99,100,103-105,124,129,137,138,144,148,170,198,223,224 |
| Rey's Fifteen-Item Memory Test             | 69,108,226-228                                                                                                             |
| Rivermead Behavioral Memory Test           | 89-91,177                                                                                                                  |
| Selective Reminding Test                   | 1,22,58,70,180                                                                                                             |
| Serial Digit Learning                      | 15                                                                                                                         |
| Verbal learning and memory test            | 2,29                                                                                                                       |
| Verbal Paired Associates                   | 9,28,38,40,49,50,64,66,77,87,110,112-114,119,133,165,188,189                                                               |
| Visual paired associates                   | 9,66                                                                                                                       |
| Visual Reproduction                        | 36,62,74,84,102,129,136,138                                                                                                |
| Williams delayed recall                    | 46                                                                                                                         |
| <i>Perception</i>                          |                                                                                                                            |
| Agnosia test                               | 70                                                                                                                         |
| Benton Test of Facial Recognition          | 15,56,136                                                                                                                  |
| Benton Judgement of Line Orientation       | 15,18,19,21,36,53,56,60,65,79,89,91,99,108,112-114,117,145,146,179,185,198                                                 |
| Birmingham Object Recognition Battery      | 21                                                                                                                         |
| Cancellation tests                         | 19-21,25,27,77,80,99,108,180                                                                                               |
| Cube Counting                              | 37                                                                                                                         |
| Dot Counting                               | 37                                                                                                                         |
| Efron Shapes Discrimination Test           | 93                                                                                                                         |
| Matching to sample                         | 9                                                                                                                          |
| Motor-Free Visual Perception test          | 5,8,96                                                                                                                     |
| Number location                            | 37                                                                                                                         |
| Poppelreuter's Overlapping Figures Test    | 195                                                                                                                        |
| Visual Object and Space Perception Battery | 22,41,53,112-114,127,131,146,148,157,160,163,176,179,197                                                                   |
| <i>Social cognition</i>                    |                                                                                                                            |
| Aprosodia Battery                          | 192                                                                                                                        |
| Awareness of Social Inference Test         | 161,178                                                                                                                    |
| Ekman 60 Faces Test                        | 41,159,181,187                                                                                                             |
| Expression Grouping                        | 181                                                                                                                        |
| Faux Pas Recognition Test                  | 47,192                                                                                                                     |
| Happe Cartoon and Written Scenarios task   | 127,178                                                                                                                    |
| Judgement of Preference Test               | 39,159,160,163                                                                                                             |



|                                                               |                                                                                                                                 |
|---------------------------------------------------------------|---------------------------------------------------------------------------------------------------------------------------------|
| Missing Cartoons                                              | 181                                                                                                                             |
| Reading the Mind in the Eyes Test                             | 39,47,88,157-160,178,182,206                                                                                                    |
| Social Intelligence Battery                                   | 166                                                                                                                             |
| Story-based Empathy task                                      | 41                                                                                                                              |
| Theory of mind-15                                             | 111                                                                                                                             |
| Theory of mind -story comprehension                           | 158                                                                                                                             |
| <i>Verbal function and language skills</i>                    |                                                                                                                                 |
| Aachen Aphasia Test                                           | 170,177,184                                                                                                                     |
| Arizona Battery of Communication Disorders of Dementia        | 8,209                                                                                                                           |
| Assessment of Pragmatic Abilities and Cognitive Substrates    | 166                                                                                                                             |
| Battery for Analysis of Aphasic Deficits                      | 18-20,41,95,131                                                                                                                 |
| Benton Aural and reading comprehension                        | 96                                                                                                                              |
| Benton Naming Test                                            | 96                                                                                                                              |
| Bilingual Aphasia Test                                        | 79,117                                                                                                                          |
| Borgenhausen Semantic Test                                    | 66,67                                                                                                                           |
| Boston Diagnostic Aphasia Examination                         | 8,53,59,65,101,146,162,203,209                                                                                                  |
| Boston Naming Test                                            | 4,15,21,28,34,36-38,40,48-50,53,55-57,59,60,63-65,69,71,72,74,77,82-92,96,97,99,101,104,108,136,145,151,160,162,173,176,180,207 |
| British Picture Vocabulary Scale                              | 146,162                                                                                                                         |
| Chinese Aphasia Battery                                       | 43,44                                                                                                                           |
| Dysillabic Word Test                                          | 85                                                                                                                              |
| Graded Difficulty Spelling Test                               | 160,162                                                                                                                         |
| Graded Naming Test                                            | 25,92,112-114,118,127,146,157-160,163,178,179,190,229                                                                           |
| Hodges semantic test battery                                  | 185                                                                                                                             |
| Kissing and Dancing Test                                      | 59,146,162,230                                                                                                                  |
| Manchester Picture Naming                                     | 127                                                                                                                             |
| Mill Hill Vocabulary Scales                                   | 46                                                                                                                              |
| Moraic Segmentation Test                                      | 188                                                                                                                             |
| Multiple choice vocabulary tests                              | 3,66,67,109,128,143                                                                                                             |
| North American Adult Reading Test                             | 9,28,56,59,80,89-92,102,104,113,114,118,119,127,129,136,138,145,151,157,159,165,172,176,179,187,190,202,203,229,231,232         |
| Omission of Kana Letters                                      | 94                                                                                                                              |
| Peabody Picture Vocabulary Test                               | 8,198,207,209                                                                                                                   |
| Phonetic Inventory                                            | 184                                                                                                                             |
| Psycholinguistic Assessment of Language Processing in Aphasia | 88,160,229                                                                                                                      |
| Pyramids and Palm Trees Test                                  | 59,70,72,87,92,99,146,162,230                                                                                                   |

|                                                                       |                                                                          |
|-----------------------------------------------------------------------|--------------------------------------------------------------------------|
| Reading and Dictation Test                                            | 11                                                                       |
| Spontaneous writing                                                   | 24                                                                       |
| Spot-the-Word                                                         | 162                                                                      |
| Standard Language Test of Aphasia                                     | 94,189                                                                   |
| Sydney Language Battery                                               | 148,233                                                                  |
| Syntax Test of Aphasia                                                | 191                                                                      |
| Test for the Reception of Grammar                                     | 72,92,146,148,160,162,179,185,197,234                                    |
| Test of adolescent/adult word finding                                 | 53                                                                       |
| Test of verbal picture naming                                         | 58,70                                                                    |
| Token Test                                                            | 16,18,21,32,77,85,96,123,131,140,146,152,166,167,176,185,207             |
| Wechsler Adult Intelligence Scale                                     | 2,9,45,62,96,99,101,103,124,144                                          |
| Wechsler Test of Adult Reading                                        | 25,39,40,49,57,87,146,162,178,182,235                                    |
| Wide Range Achievement Test                                           | 36,96,104                                                                |
| Western Aphasia Battery                                               | 11,12,136,188                                                            |
| Zingeser and Berndt's Test of Noun and Verb Processing                | 59                                                                       |
| <b><i>Test batteries</i></b>                                          |                                                                          |
| ALS-Computerized Frontal Battery                                      | 56                                                                       |
| Behavioural Assessment of the Dysexecutive Syndrome                   | 134                                                                      |
| Brief Intelligence Test                                               | 23                                                                       |
| Communicative Participation Item Bank                                 | 236                                                                      |
| Comprehensive Affect Testing System                                   | 156                                                                      |
| Consortium to Establish a Registry for Alzheimer's Disease plus scale | 237                                                                      |
| Luria-Nebraska Neuropsychological Battery                             | 62,238                                                                   |
| Mental Deterioration Battery                                          | 226,227                                                                  |
| Number Processing and Calculation Battery                             | 86                                                                       |
| Wechsler Adult Intelligence Scale                                     | 108,110,132,136,138,146,162,168,178,194,239,240                          |
| Wechsler Adult Intelligence Scale - Performance IQ                    | 26,29,34,45,61,167,198,241                                               |
| Wechsler Adult Intelligence Scale - Verbal IQ                         | 26,28,29,34,45,61,96,102,119,126,129,159,198,241,242                     |
| Wechsler Memory Scales                                                | 123,131                                                                  |
| <b><i>Rating scales, inventories and screening tests</i></b>          |                                                                          |
| Addenbrooke's Cognitive Examination                                   | 22,73,98,140,147,148,150,153,156,157,161,192,217,221,233-235,243-253     |
| ALS Brief Cognitive Assessment                                        | 60                                                                       |
| ALS Cognitive Behavioral Screen                                       | 37,99,104,206,207,211,214,215,254-257                                    |
| ALS Frontotemporal Dementia Questionnaire                             | 95,204,208,222                                                           |
| Frontal Behavioral Inventory-ALS                                      | 5,32,41,44,59,60,70,72,95,99,152,154,203,208,211,215,222,232,256,258-261 |

---

|                                                                     |                                                                                                                                                                                                                                                                                                                   |
|---------------------------------------------------------------------|-------------------------------------------------------------------------------------------------------------------------------------------------------------------------------------------------------------------------------------------------------------------------------------------------------------------|
| / Frontal Behavioral Inventory                                      |                                                                                                                                                                                                                                                                                                                   |
| Alzheimer's Disease Assessment Scale-Cognitive subscale             | 78                                                                                                                                                                                                                                                                                                                |
| Blessed Orientation-Memory-Concentration Test                       | 254                                                                                                                                                                                                                                                                                                               |
| Cognitive Abilities Screening Instrument                            | 262,263                                                                                                                                                                                                                                                                                                           |
| Cognitive evaluation battery                                        | 205,242,264                                                                                                                                                                                                                                                                                                       |
| Clinical Dementia Rating scale                                      | 74,83,92,108,134,155,185,258,265-267                                                                                                                                                                                                                                                                              |
| Cortical Visual Screening Test                                      | 59                                                                                                                                                                                                                                                                                                                |
| Differential Aptitude Test                                          | 89-91                                                                                                                                                                                                                                                                                                             |
| Edinburgh Cognitive and Behavioural ALS Screen                      | 22,30,53,88,160,171,237,268-275                                                                                                                                                                                                                                                                                   |
| Frontal Assessment Battery                                          | 19,20,32,61,70,78,98,122,131,142,152,166,171,189,191,194,207,208,210,212,213,220,222,237,239,244,252,257,259-261,265,270,273,275-284                                                                                                                                                                              |
| Hasegawa dementia scale                                             | 94,168,186,191,277,285-287                                                                                                                                                                                                                                                                                        |
| Kana Pick-out Test                                                  | 168                                                                                                                                                                                                                                                                                                               |
| Kokmen Short Test of Mental Status                                  | 198,288                                                                                                                                                                                                                                                                                                           |
| Mini-Mental State Examination                                       | 4,6,9,10,14,15,17-24,27,34,35,41,42,44,48,52,54,55,59,61,63,65,69-72,74,77-79,82,83,86,89-92,95,97,99,100,104,105,117,121-124,127,128,130-132,134-137,141-144,152,157,164,168,172,173,180,184-186,189,194,196,204,205,208,210-212,215,219,220,223,229,239,240,242,253,256-260,263,265,275-278,280-283,285,289-311 |
| Milan Overall Dementia Assessment                                   | 21                                                                                                                                                                                                                                                                                                                |
| Montreal Cognitive Assessment                                       | 32,33,37,53,56,67,75,115,142,171,177,194,206,222,237,239,265,273,279,312-317                                                                                                                                                                                                                                      |
| Neurobehavioral Cognitive Status Examination                        | 96,202,203                                                                                                                                                                                                                                                                                                        |
| Newcastle Mental Test Score                                         | 9                                                                                                                                                                                                                                                                                                                 |
| Nuremberg Gerontopsychological Inventory                            | 48                                                                                                                                                                                                                                                                                                                |
| Philadelphia Brief Assessment of Cognition                          | 13                                                                                                                                                                                                                                                                                                                |
| Penn State Brief Exam of Frontal and Temporal Dysfunction Syndromes | 181,202,203,318                                                                                                                                                                                                                                                                                                   |
| Rapid Evaluation of Cognitive Function                              | 45,193                                                                                                                                                                                                                                                                                                            |
| Seoul Neuropsychological Screening Battery                          | 83                                                                                                                                                                                                                                                                                                                |
| Three Words-Three Shapes test                                       | 108                                                                                                                                                                                                                                                                                                               |
| Telephone Interview for Cognitive Status                            | 215                                                                                                                                                                                                                                                                                                               |
| University of California San Francisco Screening Battery            | 151,215,218                                                                                                                                                                                                                                                                                                       |
| Verbal Series Attention Test                                        | 102-104,129,136,138,145                                                                                                                                                                                                                                                                                           |
| Weigl's Test                                                        | 18,21,24,95,127,257,315,319                                                                                                                                                                                                                                                                                       |

---

Abbreviation: ALS, amyotrophic lateral sclerosis; IQ, intelligence quotient.

## References

1. Hartikainen P, Helkala EL, Soininen H, Riekkinen Sr P. Cognitive and memory deficits in untreated Parkinson's disease and amyotrophic lateral sclerosis patients: A comparative study. *J Neural Transm Park Dis Dement Sec.* 1993;6(2):127-137.
2. Hammer A, Vielhaber S, Rodriguez-Fornells A, Mohammadi B, Munte TF. A neurophysiological analysis of working memory in amyotrophic lateral sclerosis. *Brain Res.* 2011;1421:90-99.
3. Schreiber H, Gaigalat T, Wiedemuth-Catrinescu U, et al. Cognitive function in bulbar- and spinal-onset amyotrophic lateral sclerosis: A longitudinal study in 52 patients. *J Neurol.* 2005;252(7):772-781.
4. Volpato C, Piccione F, Silvoni S, et al. Working memory in amyotrophic lateral sclerosis: auditory event-related potentials and neuropsychological evidence. *J Clin Neurophysiol.* 2010;27(3):198-206.
5. Grace GM, Orange JB, Rowe A, Findlater K, Freedman M, Strong MJ. Neuropsychological functioning in PLS: A comparison with ALS. *Can J Neurol Sci.* 2011;38(1):88-97.
6. Mezzapesa DM, Ceccarelli A, Dicuonzo F, et al. Whole-brain and regional brain atrophy in amyotrophic lateral sclerosis. *Am J Neuroradiol.* 2007;28(2):255-259.
7. Murphy MJ, Grace GM, Tartaglia MC, et al. Widespread cerebral haemodynamics disturbances occur early in amyotrophic lateral sclerosis. *Amyotroph Lateral Scler.* 2012;13(2):202-209.
8. Strong MJ, Grace GM, Orange JB, Leeper HA, Menon RS, Aere C. A prospective study of cognitive impairment in ALS. *Neurology.* 1999;53(8):1665-1670.
9. Chari G, Shaw PJ, Sahgal A. Nonverbal visual attention, but not recognition memory or learning, processes are impaired in motor neurone disease. *Neuropsychologia.* 1996;34(5):377-385.
10. Stojkovic T, Stefanova E, Pekmezovic T, Peric S, Stevic Z. Executive dysfunction and survival in patients with amyotrophic lateral sclerosis: Preliminary report from a Serbian centre for motor neuron disease. *Amyotroph Lateral Scler and Frontotemporal Degener.* 2016;17(7-8):543-547.
11. Tsuji-Akimoto S, Hamada S, Yabe I, et al. Writing errors as a result of frontal dysfunction in Japanese patients with amyotrophic lateral sclerosis. *J Neurol.* 2010;257(12):2071-2077.
12. Yabe I, Tsuji-Akimoto S, Shiga T, et al. Writing errors in ALS related to loss of neuronal integrity in the anterior cingulate gyrus. *J Neurol Sci.* 2012;315(1-2):55-59.
13. Ayaz H, Shewokis PA, Scull L, et al. Assessment of prefrontal cortex activity in amyotrophic lateral sclerosis patients with functional near infrared spectroscopy. *J Neurosci Neuroeng.* 2014;3(1):41-51.
14. Chow TW, Miller BL, Hayashi VN, Geschwind DH. Inheritance of frontotemporal dementia. *Arch Neurol.* 1999;56(7):817-822.
15. Hanagasi HA, Gurvit IH, Ermutlu N, et al. Cognitive impairment in amyotrophic lateral sclerosis: Evidence from neuropsychological investigation and event-related potentials. *Cogn Brain Res.* 2002;14(2):234-244.
16. Rusina R, Ridzon P, Kulist'ak P, et al. Relationship between ALS and the degree of cognitive impairment, markers of neurodegeneration and predictors for poor outcome. A prospective study. *Eur J Neurol.* 2010;17(1):23-30.
17. Rusina R, Sheardova K, Rektorova I, Ridzon P, Kulist'ak P, Matej R. Amyotrophic lateral sclerosis and Alzheimer's disease: Clinical and neuropathological considerations in two cases. *Eur J Neurol.* 2007;14(7):815-818.

18. Catani M, Piccirilli M, Geloso MC, et al. Rapidly progressive aphasic dementia with motor neuron disease: A distinctive clinical entity. *Dement Geriatr Cogn Disord*. 2003;17(1-2):21-28.
19. Floris G, Borghero G, Chio A, et al. Cognitive screening in patients with amyotrophic lateral sclerosis in early stages. *Amyotroph Lateral Scler*. 2012;13(1):95-101.
20. Gainotti G, Ferraccioli M, Quaranta D, Marra C. Cross-modal recognition disorders for persons and other unique entities in a patient with right fronto-temporal degeneration. *Cortex*. 2008;44(3):238-248.
21. Gentileschi V, Muggia S, Poloni M, Spinnler H. Fronto-temporal dementia and motor neuron disease: A neuropsychological study. *Acta Neurol Scand*. 1999;100(5):341-349.
22. Matias-Guiu JA, Pytel V, Cabrera-Martin MN, et al. Amyloid- and FDG-PET imaging in amyotrophic lateral sclerosis. *Eur J Nucl Med Mol Imaging*. 2016;43(11):2050-2060.
23. Palmieri A, Abrahams S, Soraru G, et al. Emotional lability in MND: Relationship to cognition and psychopathology and impact on caregivers. *J Neurol Sci*. 2009;278(1-2):16-20.
24. Paulus KS, Magnano I, Piras MR, et al. Visual and auditory event-related potentials in sporadic amyotrophic lateral sclerosis. *Clin Neurophysiol*. 2002;113(6):853-861.
25. Pettit LD, Bastin ME, Smith C, Bak TH, Gillingwater TH, Abrahams S. Executive deficits, not processing speed relates to abnormalities in distinct prefrontal tracts in amyotrophic lateral sclerosis. *Brain*. 2013;136(11):3290-3304.
26. Poloni M, Capitani E, Mazzini L, Ceroni M. Neuropsychological measures in amyotrophic lateral sclerosis and their relationship with CT scan-assessed cerebral atrophy. *Acta Neurol Scand*. 1986;74(4):257-260.
27. Silvoni S, Volpato C, Cavinato M, et al. P300-based brain-computer interface communication: evaluation and follow-up in amyotrophic lateral sclerosis. *Front Neurosci*. 2009;3:60.
28. Kew JJM, Goldstein LH, Leigh PN, et al. The relationship between abnormalities of cognitive function and cerebral activation in amyotrophic lateral sclerosis: A neuropsychological and positron emission tomography study. *Brain*. 1993;116(6):1399-1423.
29. Frank B, Haas J, Heinze HJ, Stark E, Munte TF. Relation of neuropsychological and magnetic resonance findings in amyotrophic lateral sclerosis: Evidence for subgroups. *Clin Neurol Neurosurg*. 1997;99(2):79-86.
30. Keller J, Gorges M, Horn HT, et al. Eye-tracking controlled cognitive function tests in patients with amyotrophic lateral sclerosis: a controlled proof-of-principle study. *J Neurol*. 2015;262(8):1918-1926.
31. Ludolph AC, Langen K, Regard M, et al. Frontal lobe function in amyotrophic lateral sclerosis: A neuropsychologic and positron emission tomography study. *Acta Neurol Scand*. 1992;85(2):81-89.
32. Poletti B, Carelli L, Solca F, et al. Cognitive assessment in amyotrophic lateral sclerosis by means of P300-brain computer interface: a preliminary study. *Amyotroph Lateral Scler Frontotemporal Degener*. 2016;17(7-8):473-481.
33. Abdulla S, Machts J, Kaufmann J, et al. Hippocampal degeneration in patients with amyotrophic lateral sclerosis. *Neurobiol Aging*. 2014;35(11):2639-2645.
34. Abe K, Fujimura H, Toyooka K, Sakoda S, Yorifuji S, Yanagihara T. Cognitive function in amyotrophic lateral sclerosis. *J Neurol Sci*. 1997;148(1):95-100.
35. Ash S, Menaged A, Olm C, et al. Narrative discourse deficits in amyotrophic lateral sclerosis. *Neurology*. 2014;83(6):520-528.

36. Boeve BF, Boylan KB, Graff-Radford NR, et al. Characterization of frontotemporal dementia and/or amyotrophic lateral sclerosis associated with the GGGGCC repeat expansion in C9ORF72. *Brain*. 2012;135(3):765-783.
37. Branco LMT, Zanao T, De Rezende TJ, et al. Transcultural validation of the ALS-CBS cognitive section for the Brazilian population. *Amyotroph Lateral Scler Frontotemporal Degener*. 2017;18(1-2):60-67.
38. Burke T, Elamin M, Galvin M, Hardiman O, Pender N. Caregiver burden in amyotrophic lateral sclerosis: a cross-sectional investigation of predictors. *J Neurol*. 2015;262(6):1526-1532.
39. Burke T, Elamin M, Bede P, et al. Discordant performance on the 'Reading the mind in the eyes' test, based on disease onset in amyotrophic lateral sclerosis. *Amyotroph Lateral Scler Frontotemporal Degener*. 2016;17(7-8):467-472.
40. Burke T, Lonergan K, Pinto-Grau M, et al. Visual encoding, consolidation, and retrieval in amyotrophic lateral sclerosis: executive function as a mediator, and predictor of performance. *Amyotroph Lateral Scler Frontotemporal Degener*. 2017:1-9.
41. Consonni M, Catricalà E, Dalla Bella E, Gessa VC, Lauria G, Cappa SF. Beyond the consensus criteria: multiple cognitive profiles in amyotrophic lateral sclerosis? *Cortex*. 2016;81:162-167.
42. Consonni M, Rossi S, Cerami C, et al. Executive dysfunction affects word list recall performance: Evidence from amyotrophic lateral sclerosis and other neurodegenerative diseases. *J Neuropsychol*. 2015;11(1):74-90.
43. Cui B, Cui L, Gao J, et al. Cognitive impairment in Chinese patients with sporadic amyotrophic lateral sclerosis. *PLoS One*. 2015;10(9).
44. Cui B, Cui L, Liu M, et al. Neuropsychological investigation in Chinese patients with progressive muscular atrophy. *PLoS One*. 2015;10(6).
45. Dary-Auriol M, Ingrand P, Bonnaud V, Dumas P, Neau JP, Gil R. Cognitive impairment and amyotrophic lateral sclerosis [French]. *Rev Neurol (Paris)*. 1997;153(4):244-250.
46. David AS, Gillham RA. Neuropsychological study of motor neuron disease. *Psychosomatics*. 1986;27(6):441-445.
47. Di Rosa E, Soraru G, Kleinbub JR, et al. Theory of mind, empathy and neuropsychological functioning in X-linked spinal and bulbar muscular atrophy: a controlled study of 20 patients. *J Neurol*. 2015;262(2):394-401.
48. Duning T, Schiffbauer H, Warnecke T, et al. G-CSF prevents the progression of structural disintegration of white matter tracts in amyotrophic lateral sclerosis: A pilot trial. *PLoS One*. 2011;6(3).
49. Elamin M, Phukan J, Bede P, et al. Executive dysfunction is a negative prognostic indicator in patients with ALS without dementia. *Neurology*. 2011;76(14):1263-1269.
50. Elamin M, Bede P, Byrne S, et al. Cognitive changes predict functional decline in ALS: A population-based longitudinal study. *Neurology*. 2013;80(17):1590-1597.
51. Elamin M, Bede P, Montuschi A, Pender N, Chio A, Hardiman O. Predicting prognosis in amyotrophic lateral sclerosis: a simple algorithm. *J Neurol*. 2015;262(6):1447-1454.
52. Evans J, Olm C, McCluskey L, et al. Impaired cognitive flexibility in amyotrophic lateral sclerosis. *Cogn Behav Neurol*. 2015;28(1):17-26.
53. Farhan SM, Bartha R, Black SE, et al. The Ontario neurodegenerative disease research initiative (ONDRI). *Can J Neurol Sci*. 2016:1-7.
54. Farid K, Carter SF, Rodriguez-Vieitez E, et al. Case report of complex amyotrophic lateral sclerosis with cognitive impairment and cortical amyloid deposition. *J Alzheimers Dis*. 2015;47(3):661-667.
55. Forman MS, Farmer J, Johnson JK, et al. Frontotemporal dementia: Clinicopathological correlations. *Ann Neurol*. 2006;59(6):952-962.
56. Gillingham SM, Yunusova Y, Ganda A, et al. Assessing cognitive functioning in ALS: A focus on frontal lobe processes. *Amyotroph Lateral Scler Frontotemporal Degener*. 2016:1-11.

57. Gordon PH, Goetz RR, Rabkin JG, et al. A prospective cohort study of neuropsychological test performance in ALS. *Amyotroph Lateral Scler.* 2010;11(3):312-320.
58. Gordon PH, Delgado D, Piquard A, et al. The range and clinical impact of cognitive impairment in French patients with ALS: A cross-sectional study of neuropsychological test performance. *Amyotroph Lateral Scler.* 2011;12(5):372-378.
59. Heidler-Gary J, Hillis AE. Distinctions between the dementia in amyotrophic lateral sclerosis with frontotemporal dementia and the dementia of Alzheimer's disease. *Amyotroph Lateral Scler.* 2007;8(5):276-282.
60. Hu WT, Shelnutt M, Wilson A, et al. Behavior matters-cognitive predictors of survival in amyotrophic lateral sclerosis. *PLoS One.* 2013;8(2).
61. Ichikawa H, Takahashi N, Hieda S, Kawamura M. Bulbar-onset amyotrophic lateral sclerosis (ALS) with isolated agraphia [Japanese]. *Clinical Neurology.* 2010;50(2):81-86.
62. Iivanainen M, Laaksonen R, Niemi M, et al. Memory and psychomotor impairment following high-dose interferon treatment in amyotrophic lateral sclerosis. *Acta Neurol Scand.* 1985;72(5):475-480.
63. Irwin DJ, McMillan CT, Bretschneider J, et al. Cognitive decline and reduced survival in C9orf72 expansion frontotemporal degeneration and amyotrophic lateral sclerosis. *J Neurol Neurosurg Psychiatry.* 2013;84(2):163-169.
64. Iyer PM, Egan C, Pinto-Grau M, et al. Functional connectivity changes in resting-state EEG as potential biomarker for amyotrophic lateral sclerosis. *PLoS One.* 2015;10(6).
65. Jelsone-Swain L, Persad C, Votruba KL, et al. The relationship between depressive symptoms, disease state, and cognition in amyotrophic lateral sclerosis. *Front Psychol.* 2012;3.
66. Kasper E, Schuster C, Machts J, et al. Microstructural white matter changes underlying cognitive and behavioural impairment in ALS - An in vivo study using DTI. *PLoS One.* 2014;9 (12).
67. Kasper E, Schuster C, Machts J, et al. Dysexecutive functioning in ALS patients and its clinical implications. *Amyotroph Lateral Scler Frontotemporal Degener.* 2015;16(3-4):160-171.
68. Kasper E, Zydatis K, Schuster C, et al. No change in executive performance in ALS patients: A longitudinal neuropsychological study. *Neurodegener Dis.* 2016;16(3-4):184-191.
69. Kilani M, Micallef J, Soubrouillard C, et al. A longitudinal study of the evolution of cognitive function and affective state in patients with amyotrophic lateral sclerosis. *Amyotroph Lateral Scler Other Motor Neuron Disord.* 2004;5(1):46-54.
70. Lacomblez L, Piquard A, Vercelletto M. [Amyotrophic lateral sclerosis: cognitive and behavioral evaluation]. *Rev Neurol (Paris).* 2006;162 (2).
71. Lee SE, Khazenzon AM, Trujillo AJ, et al. Altered network connectivity in frontotemporal dementia with C9orf72 hexanucleotide repeat expansion. *Brain.* 2014;137(Pt 11):3047-3060.
72. Libon DJ, McMillan C, Avants B, et al. Deficits in concept formation in amyotrophic lateral sclerosis. *Neuropsychology.* 2012;26(4):422-429.
73. Lillo P, Savage S, Mioshi E, Kiernan MC, Hodges JR. Amyotrophic lateral sclerosis and frontotemporal dementia: A behavioural and cognitive continuum. *Amyotroph Lateral Scler.* 2012;13(1):102-109.
74. Lomen-Hoerth C, Murphy J, Langmore S, et al. Are amyotrophic lateral sclerosis patients cognitively normal? *Neurology.* 2003;60(7):1094-1097.
75. Machts J, Bittner V, Kasper E, et al. Memory deficits in amyotrophic lateral sclerosis are not exclusively caused by executive dysfunction: A comparative neuropsychological study of amnesic mild cognitive impairment. *BMC Neurosci.* 2014;15:83.

76. Machts J, Loewe K, Kaufmann J, et al. Basal ganglia pathology in ALS is associated with neuropsychological deficits. *Neurology*. 2015;85(15):1301-1309.
77. Mantovan M, Baggio L, Barba G, et al. Memory deficits and retrieval processes in ALS. *Eur J Neurol*. 2003;10(3):221-227.
78. Masuda M, Senda J, Watanabe H, et al. Involvement of the caudate nucleus head and its networks in sporadic amyotrophic lateral sclerosis-frontotemporal dementia continuum. *Amyotroph Lateral Scler Frontotemporal Degener*. 2016;17(7-8):571-579.
79. Moretti R, Torre P, Antonello RM, Carraro N, Cazzato G, Bava A. Complex cognitive disruption in motor neuron disease. *Dement Geriatr Cogn Disord*. 2002;14(3):141-150.
80. Mustafa N, Walsh E, Bryant V, et al. The effect of noninvasive ventilation on ALS patients and their caregivers. *Neurology*. 2006;66(8):1211-1217.
81. Newsom-Davis IC, Lyall RA, Leigh PN, Moxham J, Goldstein LH. The effect of non-invasive positive pressure ventilation (NIPPV) on cognitive function in amyotrophic lateral sclerosis (ALS): A prospective study. *J Neurol Neurosurg Psychiatry*. 2001;71(4):482-487.
82. Niu Q, Yi Y, Sun X, et al. The G41D mutation in the superoxide dismutase 1 gene is associated with slow motor neuron progression and mild cognitive impairment in a Chinese family with amyotrophic lateral sclerosis. *J Neurol Neurosurg Psychiatry*. 2016;87(7):788-789.
83. Oh S, Park A, Kim H, et al. Spectrum of cognitive impairment in Korean ALS patients without known genetic mutations. *PLoS One*. 2014;9(2).
84. Olney R, Murphy J, Forshew D, et al. The effects of executive and behavioral dysfunction on the course of ALS. *Neurology*. 2005;65(11):1174-1177.
85. Palmieri A, Mento G, Calvo V, et al. Female gender doubles executive dysfunction risk in ALS: A case-control study in 165 patients. *J Neurol Neurosurg Psychiatry*. 2015;86(5):574-579.
86. Palmieri A, Soraru G, D'Ascenzo C, et al. Specific numerical processing impairment in ALS patients. *Amyotroph Lateral Scler Frontotemporal Degener*. 2013;14(1):6-12.
87. Phukan J, Elamin M, Bede P, et al. The syndrome of cognitive impairment in amyotrophic lateral sclerosis: a population-based study. *J Neurol Neurosurg Psychiatry*. 2012;83:102-108.
88. Pinto-Grau M, Burke T, Lonergan K, et al. Screening for cognitive dysfunction in ALS: validation of the Edinburgh cognitive and behavioural ALS screen (ECAS) using age and education adjusted normative data. *Amyotroph Lateral Scler Frontotemporal Degener*. 2017;18(1-2):99-106.
89. Raaphorst J, de Visser M, van Tol M-J, et al. Cognitive dysfunction in lower motor neuron disease: Executive and memory deficits in progressive muscular atrophy. *J Neurol Neurosurg Psychiatry*. 2011;82(2):170-175.
90. Raaphorst J, van Tol M-J, Groot PFC, et al. Prefrontal involvement related to cognitive impairment in progressive muscular atrophy. *Neurology*. 2014;83(9):818-825.
91. Raaphorst J, van Tol MJ, de Visser M, et al. Prose memory impairment in amyotrophic lateral sclerosis patients is related to hippocampus volume. *Eur J Neurol*. 2015;22(3):547-554.
92. Rakowicz WP, Hodges JR. Dementia and aphasia in motor neuron disease: An underrecognised association? *J Neurol Neurosurg Psychiatry*. 1998;65(6):881-889.
93. Robinson KM, Lacey SC, Grugan P, Glosser G, Grossman M, McCluskey LF. Cognitive functioning in sporadic amyotrophic lateral sclerosis: A six month longitudinal study. *J Neurol Neurosurg Psychiatry*. 2006;77(5):668-670.
94. Shimizu T, Mochizuki Y, Bando M, et al. Frontotemporal lobar degeneration with writing disturbance mainly consisting of omission of kana letters. *Neurocase*. 2014;20(3):355-360.



95. Spinelli EG, Agosta F, Ferraro PM, et al. Brain MR imaging in patients with lower motor neuron-predominant disease. *Radiology*. 2016;280(2):545-556.
96. Strong MJ, Grace GM, Orange JB, Leeper HA. Cognition, language, and speech in amyotrophic lateral sclerosis: A review. *J Clin Exp Neuropsychol*. 1996;18(2):291-303.
97. Strutt AM, Palcic J, Wager JG, et al. Cognition, behavior, and respiratory function in amyotrophic lateral sclerosis. *ISRN Neurol*. 2012;2012:912123.
98. Trojsi F, Santangelo G, Caiazzo G, et al. Neuropsychological assessment in different King's clinical stages of amyotrophic lateral sclerosis. *Amyotroph Lateral Scler Frontotemporal Degener*. 2016;17(3-4):228-235.
99. Turon-Sans J, Gascon-Bayarri J, Rene R, et al. Cognitive impairment in ALS patients and validation of the Spanish version of the ALS-CBS test. *Amyotroph Lateral Scler Frontotemporal Degener*. 2016;17(3-4):221-227.
100. Vercelletto M, Delchoque C, Magne C, Huvet M, Lanier S, Feve JR. Analysis of neuropsychological disorders coupled with 99m Tc-HMPAO SPECT in amyotrophic lateral sclerosis [French]. *Rev Neurol (Paris)*. 1999;155(2):141-147.
101. Waldron EJ, Barrash J, Swenson A, Tranel D. Personality disturbances in amyotrophic lateral sclerosis: A case study demonstrating changes in personality without cognitive deficits. *J Int Neuropsychol Soc*. 2014;20(7):764-771.
102. Wheaton MW, Salamone AR, Mosnik DM, et al. Cognitive impairment in familial ALS. *Neurology*. 2007;69(14):1411-1417.
103. Witgert M, Salamone AR, Strutt AM, et al. Frontal-lobe mediated behavioral dysfunction in amyotrophic lateral sclerosis. *Eur J Neurol*. 2010;17(1):103-110.
104. Woolley SC, York MK, Moore DH, et al. Detecting frontotemporal dysfunction in ALS: utility of the ALS cognitive behavioral screen (ALS-CBSTM). *Amyotroph Lateral Scler*. 2010;11(3):303-311.
105. Wu Q, Huang LH, Yao XL, et al. A clinical study on mild cognitive impairment in amyotrophic lateral sclerosis [Chinese]. *Chinese Journal of Neurology*. 2011;44(6):400-404.
106. Zaehle T, Becke A, Naue N, et al. Working memory in ALS patients: preserved performance but marked changes in underlying neuronal networks. *PLoS One*. 2013;8(8).
107. Chio A, Borghero G, Restagno G, et al. Clinical characteristics of patients with familial amyotrophic lateral sclerosis carrying the pathogenic GGGGCC hexanucleotide repeat expansion of C9ORF72. *Brain*. 2012;135(3):784-793.
108. Peavy GM, Herzog AG, Rubin NP, Mesulam MM. Neuropsychological aspects of dementia of motor neuron disease: a report of two cases. *Neurology*. 1992;42(5):1004-1008.
109. Pinkhardt EH, Jurgens R, Becker W, et al. Signs of impaired selective attention in patients with amyotrophic lateral sclerosis. *J Neurol*. 2008;255(4):532-538.
110. Levine RL, Brooks BR, Matthews CG, Rosenbek JC, Hartmann HA, Nickles RJ. Frontotemporal hypometabolism in amyotrophic lateral sclerosis-dementia complex: preliminary observations. *J Neuroimaging*. 1993;3(4):234-241.
111. Carlier L, Mondou A, Buhour M-S, et al. Neural substrate of cognitive theory of mind impairment in amyotrophic lateral sclerosis. *Cortex*. 2015;65:19-30.
112. Abrahams S, Goldstein LH, Simmons A, et al. Word retrieval in amyotrophic lateral sclerosis: A functional magnetic resonance imaging study. *Brain*. 2004;127(7):1507-1517.

113. Abrahams S, Goldstein LH, Suckling J, et al. Frontotemporal white matter changes in amyotrophic lateral sclerosis. *J Neurol*. 2005;252(3):321-331.
114. Abrahams S, Leigh PN, Goldstein LH. Cognitive change in ALS: a prospective study. *Neurology*. 2005;64(7):1222-1226.
115. Kuruvilla MS, Green JR, Ayaz H, Murman DL. Neural correlates of cognitive decline in ALS: An fNIRS study of the prefrontal cortex. *Cogn Neurosci*. 2013;4(2):115-121.
116. Rajeswaran J, Nalini A. Neuropsychological deficits in amyotrophic lateral sclerosis (ALS): A South India experience. *Neuropsychological Trends*. 2013;13:47-58.
117. Moretti R, Torre P, Antonello R, Cazzato G. Fronto-temporal dementia versus Alzheimer disease. *Arch Gerontol Geriatr*. 2001;Suppl 7:273-278.
118. Abrahams S, Leigh PN, Harvey A, Vythelingum GN, Grise D, Goldstein LH. Verbal fluency and executive dysfunction in amyotrophic lateral sclerosis (ALS). *Neuropsychologia*. 2000;38(6):734-747.
119. Abrahams S, Goldstein LH, Al-Chalabi A, et al. Relation between cognitive dysfunction and pseudobulbar palsy in amyotrophic lateral sclerosis. *J Neurol Neurosurg Psychiatry*. 1997;62(5):464-472.
120. Amato N, Riva N, Cursi M, et al. Different frontal involvement in ALS and PLS revealed by Stroop event-related potentials and reaction times. *Front Aging Neurosci*. 2013;5:82.
121. Agosta F, Canu E, Valsasina P, et al. Divergent brain network connectivity in amyotrophic lateral sclerosis. *Neurobiol Aging*. 2013;34(2):419-427.
122. Barulli MR, Fontana A, Panza F, et al. Frontal assessment battery for detecting executive dysfunction in amyotrophic lateral sclerosis without dementia: A retrospective observational study. *BMJ Open*. 2015;5(9).
123. Chio A, Calvo A, Moglia C, et al. Amyotrophic lateral sclerosis-frontotemporal lobar dementia in 3 families with p.Ala382Thr TARDBP mutations. *Arch Neurol*. 2010;67(8):1002-1009.
124. Christidi F, Zalonis I, Smyrnis N, Evdokimidis I. Selective attention and the three-process memory model for the interpretation of verbal free recall in amyotrophic lateral sclerosis. *J Int Neuropsychol Soc*. 2012;18(5):809-818.
125. Cistaro A, Valentini MC, Chio A, et al. Brain hypermetabolism in amyotrophic lateral sclerosis: a FDG PET study in ALS of spinal and bulbar onset. *Eur J Nucl Med Mol Imaging*. 2012;39(2):251-259.
126. Evdokimidis I, Constantinidis TS, Gourtzelidis P, et al. Frontal lobe dysfunction in amyotrophic lateral sclerosis. *J Neurol Sci*. 2002;195(1):25-33.
127. Gibbons ZC, Snowden JS, Thompson JC, Happe F, Richardson A, Neary D. Inferring thought and action in motor neurone disease. *Neuropsychologia*. 2007;45(6):1196-1207.
128. Heimrath J, Gorges M, Kassubek J, et al. Additional resources and the default mode network: Evidence of increased connectivity and decreased white matter integrity in amyotrophic lateral sclerosis. *Amyotroph Lateral Scler Frontotemporal Degener*. 2014;15(7-8):537-545.
129. Jawaid A, Salamone AR, Strutt AM, et al. ALS disease onset may occur later in patients with pre-morbid diabetes mellitus. *Eur J Neurol*. 2010;17(5):733-739.
130. Ji Y, Wei L, Chui D, Wang K, Fan D. Prospective memory tasks: A more sensitive method for screening cognitive impairment in ALS? *BMC Neurol*. 2012;12:142.
131. Montuschi A, Iazzolino B, Calvo A, et al. Cognitive correlates in amyotrophic lateral sclerosis: A population-based study in Italy. *J Neurol Neurosurg Psychiatry*. 2015;86(2):168-173.

132. Ogawa T, Tanaka H, Hirata K. Cognitive deficits in amyotrophic lateral sclerosis evaluated by event-related potentials. *Clin Neurophysiol.* 2009;120(4):659-664.
133. Phukan J, Pender NP, Hardiman O. Cognitive impairment in amyotrophic lateral sclerosis. *Lancet Neurol.* 2007;6(11):994-1003.
134. Piquard A, Derouesne C, Meininger V, Lacomblez L. DEX and executive dysfunction in activities of daily living in Alzheimer's disease and frontotemporal dementia. *Annales de Gerontologie.* 2010;8(3):215-227.
135. Poujois A, Schneider FC, Faillenot I, et al. Brain plasticity in the motor network is correlated with disease progression in amyotrophic lateral sclerosis. *Hum Brain Mapp.* 2013;34(10):2391-2401.
136. Ringholz GM, Appel SH, Bradshaw M, Cooke NA, Mosnik DM, Schulz PE. Prevalence and patterns of cognitive impairment in sporadic ALS. *Neurology.* 2005;65(4):586-590.
137. Sarro L, Agosta F, Canu E, et al. Cognitive functions and white matter tract damage in amyotrophic lateral sclerosis: A diffusion tensor tractography study. *Am J Neuroradiol.* 2011;32(10):1866-1872.
138. Sterling LE, Jawaid A, Salamone AR, et al. Association between dysarthria and cognitive impairment in ALS: A prospective study. *Amyotroph Lateral Scler.* 2010;11(1-2):46-51.
139. Stukovnik V, Zidar J, Podnar S, Repovs G. Amyotrophic lateral sclerosis patients show executive impairments on standard neuropsychological measures and an ecologically valid motor-free test of executive functions. *J Clin Exp Neuropsychol.* 2010;32(10):1095-1109.
140. Trojsi F, Siciliano M, Russo A, et al. Theory of mind and its neuropsychological and quality of life correlates in the early stages of amyotrophic lateral sclerosis. *Front Psychol.* 2016;7:1934.
141. Zalonis I, Christidi F, Paraskevas G, Zabelis T, Evdokimidis I, Kararizou E. Can executive cognitive measures differentiate between patients with spinal- and bulbar-onset amyotrophic lateral sclerosis? *Arch Clin Neuropsychol.* 2012;27(3):348-354.
142. Zhu W, Fu X, Cui F, et al. ALFF value in right parahippocampal gyrus acts as a potential marker monitoring amyotrophic lateral sclerosis progression: a neuropsychological, voxel-based morphometry, and resting-state functional MRI study. *J Mol Neurosci.* 2015;57(1):106-113.
143. Aho-Ozhan HEA, Keller J, Heimrath J, et al. Perception of emotional facial expressions in amyotrophic lateral sclerosis (ALS) at behavioural and brain metabolic level. *PLoS One.* 2016;11 (10).
144. Christidi F, Kararizou E, Triantafyllou NI, Paraskevas GP, Zalonis I. Trail making test error analysis in classic motor neuron disease. *Neurol Sci.* 2013;34(8):1367-1374.
145. Massman PJ, Sims J, Cooke N, Haverkamp LJ, Appel V, Appel SH. Prevalence and correlates of neuropsychological deficits in amyotrophic lateral sclerosis. *J Neurol Neurosurg Psychiatry.* 1996;61(5):450-455.
146. Tsermentseli S, Leigh PN, Taylor LJ, Radunovic A, Catani M, Goldstein LH. Syntactic processing as a marker for cognitive impairment in amyotrophic lateral sclerosis. *Amyotroph Lateral Scler Frontotemporal Degener.* 2016;17(1-2):69-76.
147. Ahmed RM, Caga J, Devenney E, et al. Cognition and eating behavior in amyotrophic lateral sclerosis: effect on survival. *J Neurol.* 2016;263(8):1593-1603.
148. Devenney E, Hornberger M, Irish M, et al. Frontotemporal dementia associated with C9ORF72 mutation: A unique clinical profile. *JAMA Neurology.* 2014;71(3):331-339.
149. Hicks SL, Sharma R, Khan AN, et al. An eye-tracking version of the trail-making test. *PLoS One.* 2013;8 (12).
150. Hsieh S, Caga J, Leslie FVC, et al. Cognitive and behavioral symptoms in ALSFTD. *J Geriatr Psychiatry Neurol.* 2016;29(1):3-10.

151. Murphy J, Ahmed F, Lomen-Hoerth C. The UCSF screening exam effectively screens cognitive and behavioral impairment in patients with ALS. *Amyotroph Lateral Scler Frontotemporal Degener.* 2015;16(1-2):24-30.
152. Pilotto A, Rossi F, Rinaldi F, et al. Exploring olfactory function and its relation with behavioral and cognitive impairment in amyotrophic lateral sclerosis patients: A cross-sectional study. *Neurodegener Dis.* 2016;16(5-6):411-416.
153. Proudfoot M, Menke RAL, Sharma R, et al. Eye-tracking in amyotrophic lateral sclerosis: A longitudinal study of saccadic and cognitive tasks. *Amyotroph Lateral Scler Frontotemporal Degener.* 2016;17(1-2):101-111.
154. Vass R, Ashbridge E, Geser F, et al. Risk genotypes at TMEM106B are associated with cognitive impairment in amyotrophic lateral sclerosis. *Acta Neuropathol.* 2011;121(3):373-380.
155. Meoded A, Kwan JY, Peters TL, et al. Imaging findings associated with cognitive performance in primary lateral sclerosis and amyotrophic lateral sclerosis. *Dement Geriatr Cogn Dis Extra.* 2013;3(1):233-250.
156. Andrews SC, Staios M, Howe J, Reardon K, Fisher F. Multimodal emotion processing deficits are present in amyotrophic lateral sclerosis. *Neuropsychology.* 2017;31(3):304-310.
157. Cavallo M, Enrici I, MacPherson SE, Abrahams S, Adenzato M. Theory of mind in neurodegenerative diseases. Understanding social behaviour in MND patients. *Sistemi Intelligenti.* 2009;21(3):455-471.
158. Cavallo M, Adenzano M, MacPerson S, Karwig G, Enrici I, Abrahams S. Evidence of social understanding in impairment in patients with amyotrophic lateral sclerosis. *PLoS One.* 2011;6(10).
159. Girardi A, MacPherson SE, Abrahams S. Deficits in emotional and social cognition in amyotrophic lateral sclerosis. *Neuropsychology.* 2011;25(1):53-65.
160. Niven E, Newton J, Foley J, et al. Validation of the Edinburgh cognitive and behavioural amyotrophic lateral sclerosis screen (ECAS): A cognitive tool for motor disorders. *Amyotroph Lateral Scler Frontotemporal Degener.* 2015;16(3-4):172-179.
161. Staios M, Fisher F, Lindell AK, Ong B, Howe J, Reardon K. Exploring sarcasm detection in amyotrophic lateral sclerosis using ecologically valid measures. *Front Hum Neurosci.* 2013;7:178.
162. Taylor LJ, Brown RG, Tsermentseli S, et al. Is language impairment more common than executive dysfunction in amyotrophic lateral sclerosis? *J Neurol Neurosurg Psychiatry.* 2013;84(5):494-498.
163. van der Hulst E-J, Bak TH, Abrahams S. Impaired affective and cognitive theory of mind and behavioural change in amyotrophic lateral sclerosis. *J Neurol Neurosurg Psychiatry.* 2015;86(11):1208-1215.
164. Abe K, Fujimura H, Tatsumi C, Toyooka K, Yorifuji S, Yanagihara T. Eyelid "apraxia" in patients with motor neuron disease. *J Neurol Neurosurg Psychiatry.* 1995;59(6):629-632.
165. Abrahams S, Goldstein LH, Kew JJM, et al. Frontal lobe dysfunction in amyotrophic lateral sclerosis: a PET study. *Brain.* 1996;119(6):2105-2120.
166. Bambini V, Arcara G, Martinelli I, et al. Communication and pragmatic breakdowns in amyotrophic lateral sclerosis patients. *Brain Lang.* 2016;153/154:1-12.
167. Cavalleri F, De Renzi E. Amyotrophic lateral sclerosis with dementia. *Acta Neurol Scand.* 1994;89(5):391-394.
168. Ichikawa H, Koyama S, Ohno H, Ishihara K, Nagumo K, Kawamura M. Writing errors and anosognosia in amyotrophic lateral sclerosis with dementia. *Behav Neurol.* 2008;19(3):107-116.

169. Kotchoubey B, Dubischar A, Mack H, Kaiser J, Birbaumer N. Electrocortical and behavioral effects of chronic immobility on word processing. *Cogn Brain Res*. 2003;17(1):188-199.
170. Lakerveld J, Kotchoubey B, Kubler A. Cognitive function in patients with late stage amyotrophic lateral sclerosis. *J Neurol Neurosurg Psychiatry*. 2008;79(1):25-29.
171. Lange F, Vogts M-B, Seer C, et al. Impaired set-shifting in amyotrophic lateral sclerosis: An event-related potential study of executive function. *Neuropsychology*. 2016;30(1):120-134.
172. McCullagh S, Moore M, Gawel M, Feinstein A. Pathological laughing and crying in amyotrophic lateral sclerosis: An association with prefrontal cognitive dysfunction. *J Neurol Sci*. 1999;169(1-2):43-48.
173. Murphy JM, Henry RG, Langmore S, Kramer JH, Miller BL, Lomen-Hoerth C. Continuum of frontal lobe impairment in amyotrophic lateral sclerosis. *Arch Neurol*. 2007;64(4):530-534.
174. Nieuwenhuis-Mark RE, van Hoek A, Vingerhoets A. Understanding excessive crying neurologic disorders: Nature, pathophysiology, assessment, consequences, and treatment. *Cogn Behav Neurol*. 2008;21(2):111-123.
175. Sachpekidis C, Sideris H, Svoukas A, et al. Emotional impairment in a patient with amyotrophic lateral sclerosis: A (99m)Tc-HMPAO SPET brain study. *Hell J Nucl Med*. 2012;15(1):59-62+82.
176. Talbot PR, Goulding PJ, Lloyd JJ, Snowden JS, Neary D, Testa HJ. Inter-relation between 'classic' motor neuron disease and frontotemporal dementia: Neuropsychological and single photon emission computed tomography study. *J Neurol Neurosurg Psychiatry*. 1995;58(5):541-547.
177. Volpato C, Sedano MAP, Silvoni S, et al. Selective attention impairment in amyotrophic lateral sclerosis. *Amyotroph Lateral Scler Frontotemporal Degener*. 2016;17(3-4):236-244.
178. Watermeyer TJ, Brown RG, Sidle KCL, et al. Executive dysfunction predicts social cognition impairment in amyotrophic lateral sclerosis. *J Neurol*. 2015;262(7):1681-1690.
179. Wicks P, Abrahams S, Papps B, et al. SOD1 and cognitive dysfunction in familial amyotrophic lateral sclerosis. *J Neurol*. 2009;256(2):234-241.
180. Rippon GA, Scarmeas N, Gordon PH, et al. An observational study of cognitive impairment in amyotrophic lateral sclerosis. *Arch Neurol*. 2006;63(3):345-352.
181. Flaherty-Craig CV, Brothers A, Yang C, Svoboda R, Simmons Z. Declines in problem solving and anosognosia in amyotrophic lateral sclerosis: Application of Guilford's structure of intellect theory. *Cogn Behav Neurol*. 2011;24(1):26-34.
182. Burke T, Pinto-Grau M, Lonergan K, et al. Measurement of social cognition in amyotrophic lateral sclerosis: A population based study. *PLoS One*. 2016;11 (8).
183. Capitani E, Della Sala S, Marchitti C. Is there a cognitive impairment in MND? A survey with longitudinal data. *Schweiz Arch Neurol Neurochir Psychiatr*. 1994;145(1):11-13.
184. De Marco M, Merico A, Berta G, et al. Morphometric correlates of dysarthric deficit in amyotrophic lateral sclerosis. *Amyotroph Lateral Scler Frontotemporal Degener*. 2015;16(7-8):464-472.
185. Doran M, Xuereb J, Hodges JR. Rapidly progressive aphasia with bulbar motor neurone disease: A clinical and neuropsychological study. *Behav Neurol*. 1995;8(3-4):169-180.
186. Kanzaki M, Sato M, Ogawa G, et al. A case of dementia with motor neuron disease associated with agraphia - The omission of kana letters [Japanese]. *Clinical Neurology*. 2004;44(10):673-676.

187. Papps B, Abrahams S, Wicks P, Leigh PN, Goldstein LH. Changes in memory for emotional material in amyotrophic lateral sclerosis (ALS). *Neuropsychologia*. 2005;43(8):1107-1114.
188. Satoh M, Takeda K, Kuzuhara S. Agraphia in intellectually normal Japanese patients with ALS: Omission of kana letters. *J Neurol*. 2009;256(9):1455-1460.
189. Shindo A, Ueda Y, Kuzuhara S, Kokubo Y. Neuropsychological study of amyotrophic lateral sclerosis and parkinsonism-dementia complex in Kii peninsula, Japan. *BMC Neurol*. 2014;14.
190. Wicks P, Turner MR, Abrahams S, et al. Neuronal loss associated with cognitive performance in amyotrophic lateral sclerosis: an (11C)-flumazenil PET study. *Amyotroph Lateral Scler*. 2008;9(1):43-49.
191. Yoshizawa K, Yasuda N, Fukuda M, et al. Syntactic comprehension in patients with amyotrophic lateral sclerosis. *Behav Neurol*. 2014.
192. Meier S, Charleston A, Tippett L. Cognitive and behavioural deficits associated with the orbitomedial prefrontal cortex in amyotrophic lateral sclerosis. *Brain*. 2010;133(11):3444-3457.
193. Gil R, Neau JP, Dary-Auriol M, Agbo C, Tantot AM, Ingrand P. Event-related auditory evoked potentials and amyotrophic lateral sclerosis. *Arch Neurol*. 1995;52(9):890-896.
194. Peng P, Li X, Cui L, Hou B, Feng F, Shen D. Initial exploration on clinical application of resting-state functional magnetic resonance imaging amplitude of low-frequency fluctuation method on cognitive impairment in amyotrophic lateral sclerosis [Chinese]. *Chinese Journal of Neurology*. 2017;50(1):28-33.
195. Stukovnik V, Zidar J, Repovs G. Cognitive impairment in patients with amyotrophic lateral sclerosis: A neuropsychological perspective. *Zdravniski Vestnik*. 2013;82(11):755-766.
196. Esteban JC, Atares B, Zarranz JJ, Velasco F, Lambarri I. Dementia, amyotrophy, and periodic complexes on the electroencephalogram: A diagnostic challenge. *Arch Neurol*. 2001;58(10):1669-1672.
197. Bak TH, O'Donovan DG, Xuereb JH, Boniface S, Hodges JR. Selective impairment of verb processing associated with pathological changes in Brodmann areas 44 and 45 in the motor neurone disease-dementia-aphasia syndrome. *Brain*. 2001;124(1):103-120.
198. Caselli RJ, Windebank AJ, Petersen RC, et al. Rapidly progressive aphasic dementia and motor neuron disease. *Ann Neurol*. 1993;33(2):200-207.
199. Mioshi E, Hsieh S, Caga J, et al. A novel tool to detect behavioural symptoms in ALS. *Amyotroph Lateral Scler Frontotemporal Degener*. 2014;15(3-4):298-304.
200. Mioshi E, Lillo P, Yew B, et al. Cortical atrophy in ALS is critically associated with neuropsychiatric and cognitive changes. *Neurology*. 2013;80(12):1117-1123.
201. Chiò A, Ilardi A, Cammarosano S, Moglia C, Montuschi A, Calvo A. Neurobehavioral dysfunction in ALS has a negative effect on outcome and use of PEG and NIV. *Neurology*. 2012;78(14):1085-1089.
202. Flaherty-Craig C, Eslinger P, Stephens B, Simmons Z. A rapid screening battery to identify frontal dysfunction in patients with ALS. *Neurology*. 2006;67(11):2070-2072.
203. Flaherty-Craig C, Brothers A, Dearman B, Eslinger P, Simmons Z. Penn State screen exam for the detection of frontal and temporal dysfunction syndromes: Application to ALS. *Amyotroph Lateral Scler*. 2009;10(2):107-112.
204. Govaarts R, Beeldman E, Kampelmacher MJ, et al. The frontotemporal syndrome of ALS is associated with poor survival. *J Neurol*. 2016;263(12):2476-2483.

205. Hervieu-Begue M, Rouaud O, Petot A, Catteau A, Giroud M. Semantic memory assessment in 15 patients with amyotrophic lateral sclerosis. *Rev Neurol (Paris)*. 2016;172(4-5):307-312.
206. Jelsone-Swain L, Persad C, Burkard D, Welsh RC. Action processing and mirror neuron function in patients with amyotrophic lateral sclerosis: An fMRI study. *PLoS One*. 2015;10(4).
207. Nidos A, Kasselimis DS, Simos PG, et al. Frontotemporal dysfunction in amyotrophic lateral sclerosis: A discriminant function analysis. *Neurodegener Dis*. 2016;16(3-4):140-146.
208. Raaphorst J, Beeldman E, Schmand B, et al. The ALS-FTD-Q: A new screening tool for behavioral disturbances in ALS. *Neurology*. 2012;79(13):1377-1383.
209. Roberts-South A, Findlater K, Strong MJ, Orange JB. Longitudinal changes in discourse production in amyotrophic lateral sclerosis. *Semin Speech Lang*. 2012;33(1):79-94.
210. Trojsi F, Corbo D, Caiazzo G, et al. Motor and extramotor neurodegeneration in amyotrophic lateral sclerosis: A 3T high angular resolution diffusion imaging (HARDI) study. *Amyotroph Lateral Scler Frontotemporal Degener*. 2013;14(7-8):553-561.
211. Murphy J, Factor-Litvak P, Goetz R, et al. Cognitive-behavioral screening reveals prevalent impairment in a large multicenter ALS cohort. *Neurology*. 2016;86(9):813-820.
212. Ahn S, Kim S, Kim J, et al. Frontal assessment battery to evaluate frontal lobe dysfunction in ALS patients. *Can J Neurol Sci*. 2011;38(2):242-246.
213. Beeldman E, Jaeger B, Raaphorst J, et al. The verbal fluency index: Dutch normative data for cognitive testing in ALS. *Amyotroph Lateral Scler Frontotemporal Degener*. 2014;15(5-6):388-391.
214. Bock M, Duong YN, Kim A, Allen I, Murphy J, Lomen-Hoerth C. Cognitive-behavioral changes in amyotrophic lateral sclerosis: Screening prevalence and impact on patients and caregivers. *Amyotroph Lateral Scler Frontotemporal Degener*. 2016;17(5-6):366-373.
215. Christodoulou G, Gennings C, Hupf J, et al. Telephone based cognitive-behavioral screening for frontotemporal changes in patients with amyotrophic lateral sclerosis (ALS). *Amyotroph Lateral Scler Frontotemporal Degener*. 2016;17(7-8):482-488.
216. Grossman AB, Woolley-Levine S, Bradley WG, Miller RG. Detecting neurobehavioral changes in amyotrophic lateral sclerosis. *Amyotroph Lateral Scler*. 2007;8(1):56-61.
217. Hsieh S, Irish M, Foxe D, et al. My memories are important to me: Changes in autobiographical memory in amyotrophic lateral sclerosis. *Neuropsychology*. 2016;30(8):920-930.
218. Mitsumoto H, Factor-Litvak P, Andrews H, et al. ALS Multicenter Cohort Study of Oxidative Stress (ALS COSMOS): Study methodology, recruitment, and baseline demographic and disease characteristics. *Amyotroph Lateral Scler Frontotemporal Degener*. 2014;15(3-4):192-203.
219. Quinn C, Elman L, McCluskey L, et al. Frontal lobe abnormalities on MRS correlate with poor letter fluency in ALS. *Neurology*. 2012;79(6):583-588.
220. Terada T, Obi T, Miyajima H, Mizoguchi K. Assessing frontal lobe function in patients with amyotrophic lateral sclerosis by frontal assessment battery [Japanese]. *Clinical Neurology*. 2010;50(6):379-384.
221. Usman U, Choi C, Camicioli R, et al. Mesial prefrontal cortex degeneration in amyotrophic lateral sclerosis: A high-field proton MR spectroscopy study. *Am J Neuroradiol*. 2011;32(9):1677-1680.
222. Watanabe Y, Beeldman E, Raaphorst J, et al. Japanese version of the ALS-FTD-Questionnaire (ALS-FTD-Q-J). *J Neurol Sci*. 2016;367:51-55.

223. Christidi F, Zalonis I, Kyriazi S, et al. Uncinate fasciculus microstructure and verbal episodic memory in amyotrophic lateral sclerosis: A diffusion tensor imaging and neuropsychological study. *Brain Imaging Behav.* 2014;8(4):497-505.
224. Christidi F, Karavasilis E, Zalonis I, et al. Memory-related white matter tract integrity in amyotrophic lateral sclerosis: An advanced neuroimaging and neuropsychological study. *Neurobiol Aging.* 2017;49:69-78.
225. Munte TF, Troger M, Nusser I, et al. Recognition memory deficits in amyotrophic lateral sclerosis assessed with event-related brain potentials. *Acta Neurol Scand.* 1998;98(2):110-115.
226. Gallassi R, Montagna P, Ciardulli C, Lorusso S, Mussuto V, Stracciari A. Cognitive impairment in motor neuron disease. *Acta Neurol Scand.* 1985;71(6):480-484.
227. Gallassi R, Montagna P, Morreale A, et al. Neuropsychological, electroencephalogram and brain computed tomography findings in motor neuron disease. *Eur Neurol.* 1989;29(2):115-120.
228. Gallassi R, Lenzi P, Stracciari A, et al. Neuropsychological assessment of mental deterioration: purpose of a brief battery and a probabilistic definition of "normality" and "non-normality". *Acta Psychiatr Scand.* 1986;74:62-67.
229. Cobble M. Language impairment in motor neurone disease. *J Neurol Sci.* 1998;160 Suppl 1:S47-52.
230. Hillis AE, Heidler-Gary J, Newhart M, Chang S, Ken L, Bak TH. Naming and comprehension in primary progressive aphasia: the influence of grammatical word class. *Aphasiology.* 2006;20(2-4):246-256.
231. Goldstein LH, Newsom-Davis IC, Bryant V, Brammer M, Leigh PN, Simmons A. Altered patterns of cortical activation in ALS patients during attention and cognitive response inhibition tasks. *J Neurol.* 2011;258(12):2186-2198.
232. Flaherty C, Brothers A, Hoffer D, et al. VALUES: A national multicenter study demonstrating gender differences in amyotrophic lateral sclerosis with behavioral impairment. *Neurodegener Dis Manag.* 2013;3(6):515-524.
233. Leslie FV, Hsieh S, Caga J, et al. Semantic deficits in amyotrophic lateral sclerosis. *Amyotroph Lateral Scler Frontotemporal Degener.* 2015;16(1-2):46-53.
234. Kamminga J, Leslie FVC, Hsieh S, et al. Syntactic comprehension deficits across the FTD-ALS continuum. *Neurobiol Aging.* 2016;41:11-18.
235. Martin NH, Landau S, Janssen A, et al. Psychological as well as illness factors influence acceptance of non-invasive ventilation (NIV) and gastrostomy in amyotrophic lateral sclerosis (ALS): A prospective population study. *Amyotroph Lateral Scler Frontotemporal Degener.* 2014;15(5-6):376-387.
236. Baylor C, Yorkston K, Eadie T, Kim J, Chung H, Amtmann D. The communicative participation item bank (CPIB): item bank calibration and development of a disorder-generic short form. *J Speech Lang Hear Res.* 2013;56(4):1190-1208.
237. Lule D, Burkhardt C, Abdulla S, et al. The Edinburgh cognitive and behavioural amyotrophic lateral sclerosis screen: A cross-sectional comparison of established screening tools in a German-Swiss population. *Amyotroph Lateral Scler Frontotemporal Degener.* 2015;16(1-2):16-23.
238. Boyar J, Decker E. Amyotrophic lateral sclerosis: An unusual case report. *Int J Clin Neuropsych.* 1985;7(3):137-140.
239. Hirayanagi K, Sato M, Furuta N, Makioka K, Ikeda Y. Juvenile-onset sporadic amyotrophic lateral sclerosis with a frameshift FUS gene mutation presenting unique neuroradiological findings and cognitive impairment. *Intern Med.* 2016;55(6):689-693.
240. Nishio M, Niimi S. Changes over time in dysarthric patients with amyotrophic lateral sclerosis (ALS): a study of changes in speaking rate and maximum repetition rate (MRR). *Clin Linguist Phon.* 2000;14(7):485-497.



241. Yoshida M, Murakami N, Hashizume Y, Takahashi A. [A clinicopathological study on 13 cases of motor neuron disease with dementia]. *Rinsho Shinkeigaku - Clinical Neurology*. 1992;32(11):1193-1202.
242. Portet F, Cadilhac C, Touchon J, Camu W. Cognitive impairment in motor neuron disease with bulbar onset. *Amyotroph Lateral Scler Other Motor Neuron Disord*. 2001;2(1):23-29.
243. Ahmed RM, Mioshi E, Caga J, et al. Body mass index delineates ALS from FTD: implications for metabolic health. *J Neurol*. 2014;24.
244. Chen Y, Lin Z, Chen X, et al. Large C9orf72 repeat expansions are seen in Chinese patients with sporadic amyotrophic lateral sclerosis. *Neurobiol Aging*. 2016;38:217.e215-217.e222.
245. De Silva D, Hsieh S, Caga J, et al. Motor function and behaviour across the ALS-FTD spectrum. *Acta Neurol Scand*. 2016;133(5):367-372.
246. Devenney EM, Landin-Romero R, Irish M, et al. The neural correlates and clinical characteristics of psychosis in the frontotemporal dementia continuum and the C9orf72 expansion. *Neuroimage Clin*. 2017;13:439-445.
247. Fisher F, Philpott A, Andrews SC, Maule R, Douglas J. Characterizing social communication changes in amyotrophic lateral sclerosis. *Int J Lang Commun Disord*. 2016:No Pagination Specified.
248. Hsieh S, Leyton CE, Caga J, et al. The evolution of caregiver burden in frontotemporal dementia with and without amyotrophic lateral sclerosis. *J Alzheimers Dis*. 2016;49(3):875-885.
249. Lillo P, Mioshi E, Burrell JR, Kiernan MC, Hodges JR, Hornberger M. Grey and white matter changes across the amyotrophic lateral sclerosis-frontotemporal dementia continuum. *PLoS One*. 2012;7 (8).
250. Matias-Guiu JA, Cabrera-Martin MN, Moreno-Ramos T, et al. Amyloid and FDG-PET study of logopenic primary progressive aphasia: evidence for the existence of two subtypes. *J Neurol*. 2015;262(6):1463-1472.
251. Mioshi E, Caga J, Lillo P, et al. Neuropsychiatric changes precede classic motor symptoms in ALS and do not affect survival. *Neurology*. 2014;82(2):149-155.
252. Wei Q, Chen X, Cao B, et al. Associations between neuropsychiatric symptoms and cognition in Chinese patients with amyotrophic lateral sclerosis. *Amyotroph Lateral Scler Frontotemporal Degener*. 2016;17(5-6):358-365.
253. Wei Q, Chen X, Zheng Z, et al. Screening for cognitive impairment in a Chinese ALS population. *Amyotroph Lateral Scler Frontotemporal Degener*. 2015;16(1-2):40-45.
254. Bentley B, O'Connor M, Kane R, Breen LJ. Feasibility, acceptability, and potential effectiveness of dignity therapy for people with motor neurone disease. *PLoS One*. 2014;9(5).
255. Nakamura M, Bieniek KF, Lin W-L, et al. A truncating SOD1 mutation, p.Gly141X, is associated with clinical and pathologic heterogeneity, including frontotemporal lobar degeneration. *Acta Neuropathol*. 2015;130(1):145-157.
256. Rabkin J, Goetz R, Murphy JM, Factor-Litvak P, Mitsumoto H, Group ACS. Cognitive impairment, behavioral impairment, depression, and wish to die in an ALS cohort. *Neurology*. 2016;87(13):1320-1328.
257. Tremolizzo L, Pellegrini A, Susani E, et al. Behavioural but not cognitive impairment is a determinant of caregiver burden in amyotrophic lateral sclerosis. *Eur Neurol*. 2016;75(3-4):191-194.
258. Gordon PH, Wang Y, Doorish C, et al. A screening assessment of cognitive impairment in patients with ALS. *Amyotroph Lateral Scler*. 2007;8(6):362-365.
259. Vijverberg EGB, Dols A, Krudop WA, et al. Diagnostic accuracy of the frontotemporal dementia consensus criteria in the late-onset frontal lobe syndrome. *Dement Geriatr Cogn Disord*. 2016;41(3-4):210-219.

260. Wei QQ, Chen XP, Zheng ZZ, et al. Frontal lobe function and behavioral changes in amyotrophic lateral sclerosis: a study from Southwest China. *J Neurol*. 2014;261(12):2393-2400.
261. Cui B, Cui LY, Liu MS, et al. Behavioral symptoms in motor neuron disease and their negative impact on caregiver burden. *Chin Med J*. 2015;128(17):2295-2300.
262. Ahlskog JE, Waring SC, Petersen RC, et al. Olfactory dysfunction in Guamanian ALS, parkinsonism, and dementia. *Neurology*. 1998;51(6):1672-1677.
263. Galasko D, Salmon DP, Craig UK, Thal LJ, Schellenberg G, Wiederholt W. Clinical features and changing patterns of neurodegenerative disorders on Guam, 1997-2000. *Neurology*. 2002;58(1):90-97.
264. Havet V. [Neuropsychological assessment in amyotrophic lateral sclerosis]. *Rev Neurol (Paris)*. 2006;162 (2).
265. Abe K, Ikeda Y, Kurata T, et al. Cognitive and affective impairments of a novel SCA/MND crossroad mutation Asidan. *Eur J Neurol*. 2012;19(8):1070-1078.
266. Yuan Q, Jia J. Reduced cognitive function in Chinese patients with early amyotrophic lateral sclerosis and associated factors. *Int J Neurosci*. 2010;120(10):641-646.
267. Yuan Q, Jia JP. Cognitive function and the characteristics of the related factors in patients with motor neuron disease [Chinese]. *Zhongguo lin chuang kang fu*. 2005;9(37):10-12.
268. Abrahams S, Newton J, Niven E, Foley J, Bak TH. Screening for cognition and behaviour changes in ALS. *Amyotroph Lateral Scler Frontotemporal Degener*. 2014;15(1-2):9-14.
269. Bohm S, Aho-Ozhan HE, Keller J, et al. Medical decisions are independent of cognitive impairment in amyotrophic lateral sclerosis. *Neurology*. 2016;87(16):1737-1738.
270. Burkhardt C, Neuwirth C, Weber M. Longitudinal assessment of the Edinburgh cognitive and behavioural amyotrophic lateral sclerosis screen (ECAS): lack of practice effect in ALS patients? *Amyotroph Lateral Scler Frontotemporal Degener*. 2017:1-8.
271. Gorges M, Muller HP, Lule D, et al. Eye movement deficits are consistent with a staging model of pTDP-43 pathology in amyotrophic lateral sclerosis. *PLoS One*. 2015;10 (11).
272. Loose M, Burkhardt C, Aho-Ozhan H, et al. Age and education-matched cut-off scores for the revised German/Swiss-German version of ECAS. *Amyotroph Lateral Scler Frontotemporal Degener*. 2016;17(5-6):374-376.
273. Poletti B, Solca F, Carelli L, et al. The validation of the Italian Edinburgh cognitive and behavioural ALS screen (ECAS). *Amyotroph Lateral Scler Frontotemporal Degener*. 2016;17(7-8):489-498.
274. Steinacker P, Huss A, Mayer B, et al. Diagnostic and prognostic significance of neurofilament light chain NF-L, but not progranulin and S100B, in the course of amyotrophic lateral sclerosis: Data from the German MND-net. *Amyotroph Lateral Scler Frontotemporal Degener*. 2017;18(1-2):112-119.
275. Ye S, Ji Y, Li C, He J, Liu X, Fan D. The Edinburgh cognitive and behavioural ALS screen in a Chinese amyotrophic lateral sclerosis population. *PLoS One*. 2016;11(5).
276. Huey ED, Koppel J, Armstrong N, Grafman J, Floeter MK. A pilot study of the prevalence of psychiatric disorders in PLS and ALS. *Amyotroph Lateral Scler*. 2010;11(3):293-297.
277. Morimoto N, Kurata T, Sato K, Ikeda Y, Sato S, Abe K. Frontal dysfunctions of ALS-PBP patients in relation to their bulbar symptoms and rCBF decline. *J Neurol Sci*. 2012;319(1-2):96-101.

278. Oh SI, Oh KW, Kim HJ, Park JS, Kim SH. Impaired perception of emotional expression in amyotrophic lateral sclerosis. *J Clin Neurol*. 2016;12(3):295-300.
279. Osborne RA, Sekhon R, Johnston W, Kalra S. Screening for frontal lobe and general cognitive impairment in patients with amyotrophic lateral sclerosis. *J Neurol Sci*. 2014;336(1-2):191-196.
280. Oskarsson B, Quan D, Rollins YD, Neville HE, Ringel SP, Arciniegas DB. Using the Frontal assessment battery to identify executive function impairments in amyotrophic lateral sclerosis: A preliminary experience. *Amyotroph Lateral Scler*. 2010;11(1-2):244-247.
281. Pupillo E, Bianchi E, Messina P, et al. Extrapyrmidal and cognitive signs in amyotrophic lateral sclerosis: A population based cross-sectional study. *Amyotroph Lateral Scler Frontotemporal Degener*. 2015;16(5-6):324-330.
282. Takeda T, Iijima M, Uchihara T, et al. TDP-43 pathology progression along the olfactory pathway as a possible substrate for olfactory impairment in amyotrophic lateral sclerosis. *J Neuropathol Exp Neurol*. 2015;74(6):547-556.
283. Tsujimoto M, Senda J, Ishihara T, et al. Behavioral changes in early als correlate with voxel-based morphometry and diffusion tensor imaging. *J Neurol Sci*. 2011;307(1-2):34-40.
284. Westeneng HJ, Walhout R, Straathof M, et al. Widespread structural brain involvement in ALS is not limited to the C9orf72 repeat expansion. *J Neurol Neurosurg Psychiatry*. 2016;87(12):1354-1360.
285. Ichikawa H, Kawamura M. Symptoms of frontotemporal dementia [Japanese]. *Brain Nerve*. 2009;61(11):1227-1235.
286. Ishihara K, Murakami H, Ichikawa H, Fukui T, Kawamura M. A case of amyotrophic lateral sclerosis with dementia presenting long clinical course [Japanese]. *Brain Nerve*. 2003;55(2):157-161.
287. Ichikawa H, Takahashi N, Hieda S, Ohno H, Kawamura M. Agraphia in bulbar-onset amyotrophic lateral sclerosis: Not merely a consequence of dementia or aphasia. *Behav Neurol*. 2008;20:91-99.
288. Savica R, Adeli A, Vemuri P, et al. Characterization of a family with c9FTD/ALS associated with the GGGGCC repeat expansion in C9ORF72. *Arch Neurol*. 2012;69(9):1164-1169.
289. Aisen ML, Sevilla D, Gibson G, et al. 3,4-Diaminopyridine as a treatment for amyotrophic lateral sclerosis. *J Neurol Sci*. 1995;129(1):21-24.
290. Anneser JMH, Krzovska M, Borasio GD, Danek A. Occurrence of the "applause sign" in patients with amyotrophic lateral sclerosis. *Clin Neurol Neurosurg*. 2015;137:8-10.
291. Chio A, Vignola A, Mastro E, et al. Neurobehavioral symptoms in ALS are negatively related to caregivers' burden and quality of life. *Eur J Neurol*. 2010;17(10):1298-1303.
292. Chio A, Gauthier A, Montuschi A, et al. A cross sectional study on determinants of quality of life in ALS. *J Neurol Neurosurg Psychiatry*. 2004;75(11):1597-1601.
293. Creemers H, Veldink JH, Grupstra H, Nollet F, Beelen A, Van Den Berg LH. Cluster RCT of case management on patients' quality of life and caregiver strain in ALS. *Neurology*. 2014;82(1):23-31.
294. Farnikova K, Kanovsky P, Nestrail I, Otruba P. Coexistence of parkinsonism, dementia and upper motor neuron syndrome in four Czech patients. *J Neurol Sci*. 2010;296(1-2):47-54.
295. Ganzini L, Goy ER, Dobscha SK. Prevalence of depression and anxiety in patients requesting physicians' aid in dying: cross sectional survey. *BMJ*. 2008;337.
296. Gao F, Fan DS, Wang HL, et al. [Survey of cognitive function in motor neuron disease]. *Zhonghua Nei Ke Za Zhi*. 2009;48(1):31-34.
297. Gibbons ZC, Richardson A, Neary D, Snowden JS. Behaviour in amyotrophic lateral sclerosis. *Amyotroph Lateral Scler*. 2008;9(2):67-74.

298. Hammond FM, Alexander DN, Cutler AJ, et al. PRISM II: An open-label study to assess effectiveness of dextromethorphan/quinidine for pseudobulbar affect in patients with dementia, stroke or traumatic brain injury. *BMC Neurol.* 2016;16 (89).
299. Iwasaki Y, Kinoshita M, Ikeda K, Takamiya K, Shiojima T. Cognitive impairment in amyotrophic lateral sclerosis and its relation to motor disabilities. *Acta Neurol Scand.* 1990;81(2):141-143.
300. Iwasaki Y, Kinoshita M, Ikeda K, Takamiya K, Shiojima T. Neuropsychological dysfunctions in amyotrophic lateral sclerosis: Relation to motor disabilities. *Int J Neurosci.* 1990;54(3-4):191-195.
301. Maessen M, Veldink JH, Onwuteaka-Philipsen BD, et al. Euthanasia and physician-assisted suicide in amyotrophic lateral sclerosis: a prospective study. *J Neurol.* 2014;261(10):1894-1901.
302. Neutel D, Miltenberger-Miltenyi G, Silva I, de Carvalho M. Chorea-acanthocytosis presenting as motor neuron disease. *Muscle Nerve.* 2012;45(2):293-295.
303. Ozanne AG, Persson LI. Correlations in health status between estimates of families of people with amyotrophic lateral sclerosis and estimates of staff. *Palliat Support Care.* 2013;11(3):183-189.
304. Raggi A, Consonni M, Iannaccone S, et al. Auditory event-related potentials in non-demented patients with sporadic amyotrophic lateral sclerosis. *Clin Neurophysiol.* 2008;119(2):342-350.
305. Takayasu N, Ito K, Kondo M, Muranishi M, Nagakane Y, Nakagawa M. A case of amyotrophic lateral sclerosis presenting as motor aphasia in its early stage [Japanese]. *Brain Nerve.* 2006;58(8):709-713.
306. Terada T, Obi T, Miyata J, et al. Correlation of frontal atrophy with behavioral changes in amyotrophic lateral sclerosis. *Neurol Clin Neurosci.* 2016;4(3):85-92.
307. Terada T, Obi T, Yoshizumi M, Murai T, Miyajima H, Mizoguchi K. Frontal lobe-mediated behavioral changes in amyotrophic lateral sclerosis: Are they independent of physical disabilities? *J Neurol Sci.* 2011;309(1-2):136-140.
308. Tomik B, Adamek D, Lechwacka A, et al. ALS-Plus syndrome. A clinical and neuropathological case study. *Pol J Pathol.* 2000;51(4):191-196.
309. Turner GS, Tjaden K, Weismer G. The influence of speaking rate on vowel space and speech intelligibility for individuals with amyotrophic lateral sclerosis. *J Speech Hear Res.* 1995;38(5):1001-1013.
310. Zimmerman EK, Eslinger PJ, Simmons Z, Barrett AM. Emotional perception deficits in amyotrophic lateral sclerosis. *Cogn Behav Neurol.* 2007;20(2):79-82.
311. Cui F, Zhu W, Zhou Z, et al. Frequency and risk factor analysis of cognitive and anxiety-depressive disorders in patients with amyotrophic lateral sclerosis/motor neuron disease. *Neuropsychiatr Dis Treat.* 2015;11.
312. Cardenas-Blanco A, Machts J, Acosta-Cabrero J, et al. Central white matter degeneration in bulbar- and limb-onset amyotrophic lateral sclerosis. *J Neurol.* 2014;261(10):1961-1967.
313. Levitskii GN, Levitskii AS, Gilod VM. Mental disorders in patients with lateral amyotrophic sclerosis and their family members. [Russian]. *Zh Nevrol Psikhiatr Im S S Korsakova.* 2015;115(2):64-67.
314. Levitsky GN, Gilod VM, Chub RV. [Cognitive impairment in amyotrophic lateral sclerosis]. *Zh Nevrol Psikhiatr Im S S Korsakova.* 2015;115(2):11-15.
315. Tremolizzo L, Pellegrini A, Conti E, et al. BDNF serum levels with respect to multidimensional assessment in amyotrophic lateral sclerosis. *Neurodegener Dis.* 2016;16(3-4):192-198.

316. Yunusova Y, Graham NL, Shellikeri S, et al. Profiling speech and pausing in amyotrophic lateral sclerosis (ALS) and frontotemporal dementia (FTD). *PLoS One*. 2016;11(1).
317. Zhang Y, Fang T, Wang Y, et al. Occipital cortical gyrification reductions associate with decreased functional connectivity in amyotrophic lateral sclerosis. *Brain Imaging Behav*. 2016;11(1):1-7.
318. Claire FC, Brothers A, McFalls A, Yang C, Simmons Z. VALUES: A national multicenter study of regional and gender differences in frontotemporal disease in amyotrophic lateral sclerosis. *Neurodegener Dis Manag*. 2012;2(3):325-336.
319. Tremolizzo L, Susani E, Lunetta C, Corbo M, Ferrarese C, Appollonio I. Primitive reflexes in amyotrophic lateral sclerosis: Prevalence and correlates. *J Neurol*. 2014;261(6):1196-1202.
